# Supplementary material for: Prognostic relevance of UCH-L1 and α-internexin in pancreatic neuroendocrine tumors
Source: PubMed Central journal article supplement (PMC5438410; doi:10.1038/s41598-017-02051-1), 2017-05-19
Supplement: 41598_2017_2051_MOESM1_ESM.pdf [file 41598_2017_2051_MOESM1_ESM.pdf]

## Prognostic relevance of UCH-L1 and $\alpha$ -internexin in pancreatic neuroendocrine tumors

Yu-Li Song<sup>1†</sup>, Run Yu<sup>2†</sup>, Xin-Wei Qiao<sup>1†</sup>, Chun-Mei Bai<sup>3</sup>, Chong-Mei Lu<sup>1</sup>, Yu Xiao<sup>4</sup>, Ding-Rong Zhong<sup>4</sup>, Jie Chen<sup>4</sup>, Yu-Pei Zhao<sup>5</sup>, Tai-Ping Zhang<sup>5</sup>, Tian-Tian Song<sup>1</sup>, He-Li Gao<sup>3</sup>, Ying-Hua Wan<sup>1</sup>, Lin Shen<sup>6</sup>, Jie Chen<sup>7</sup>, Bin Lv<sup>8</sup>, Jian-Jiang Hao<sup>9</sup>, Ye Zhang<sup>10</sup>, Laura Tang<sup>11</sup>, Yuan-Jia Chen<sup>1\*</sup>

**Authors' Affiliations:** <sup>1</sup> Department of Gastroenterology, Peking Union Medical College Hospital, Peking Union Medical College, Chinese Academy of Medical Sciences, Beijing, 100730, China, <sup>2</sup> Division of Endocrinology, Cedars-Sinai Medical Center, and Division of Endocrinology, Diabetes & Metabolism, UCLA, Los Angeles, California 90095, USA, <sup>3</sup> Department of Oncology, <sup>4</sup> Department of Pathology, <sup>5</sup> Department of Surgery, Peking Union Medical College Hospital, Peking Union Medical College, Chinese Academy of Medical Sciences, Beijing, 100730, China, <sup>6</sup> Department of Gastrointestinal Medical Oncology, Peking University School of Oncology, Beijing Cancer Hospital and Institute, Beijing 100142, <sup>7</sup> Department of Gastroenterology, the First Affiliated Hospital of Sun Yat-Sen University, Guangzhou, 510080, China, <sup>8</sup> Department of Gastroenterology, the First Affiliated Hospital of Zhejiang Chinese Medical University, Hangzhou, 310006, China, <sup>9</sup> *Poochon Scientific, Frederick*, MD 21704, USA, <sup>10</sup> Department of Molecular and Biochemistry, Institute of Basic Medical Sciences, Peking Union Medical College, Chinese Academy of Medical Sciences, Beijing, 100730, China, <sup>11</sup> Department of Pathology, Memorial Sloan-Kettering Cancer Center, New York City, 10065, USA.

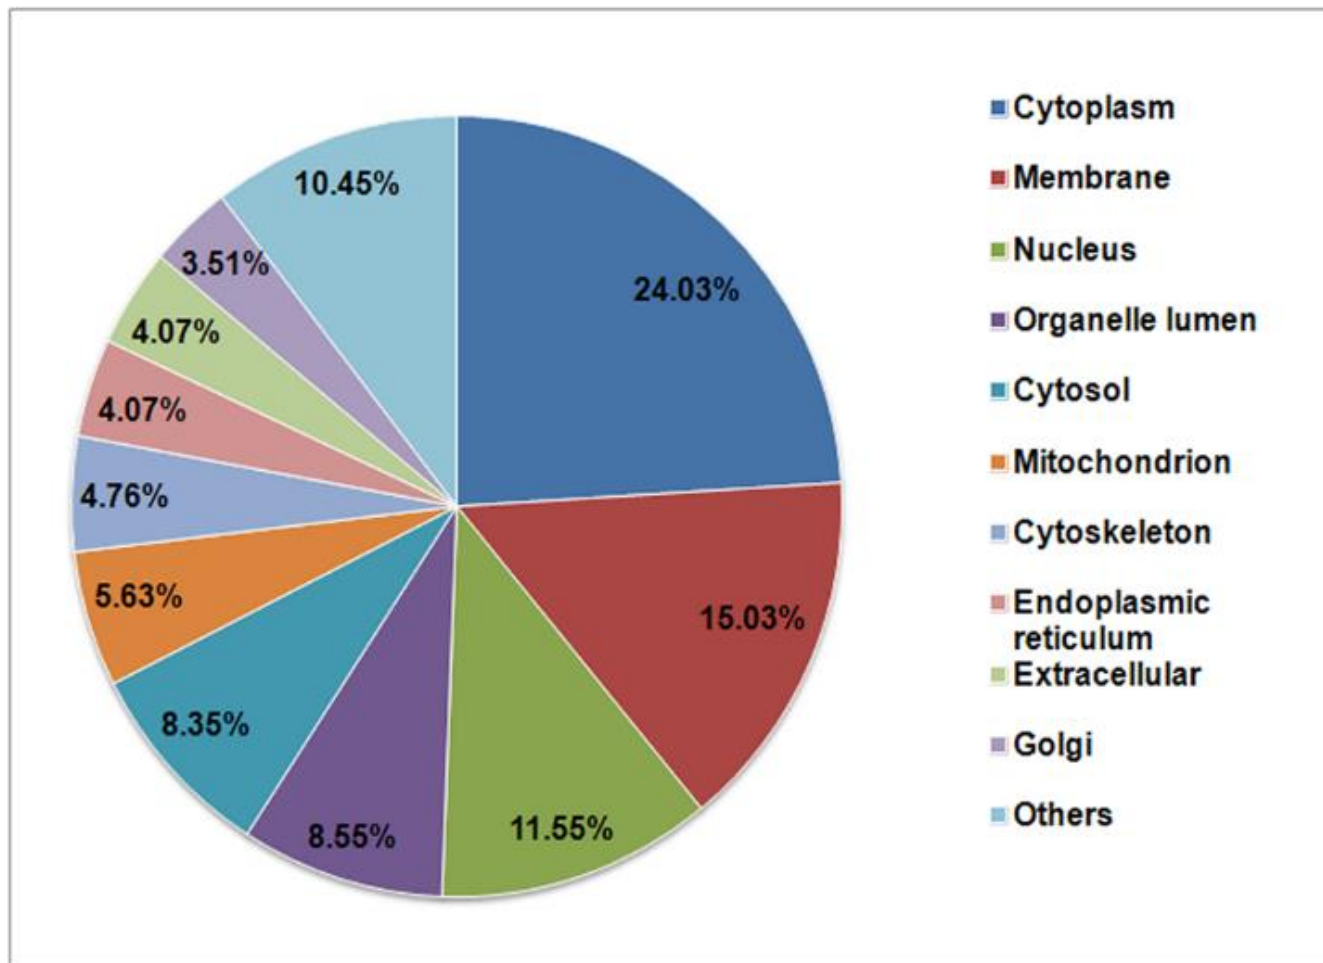

**Supplementary Figure S1.** Subcellular Location of Proteins Differentially Expressed in Tumors

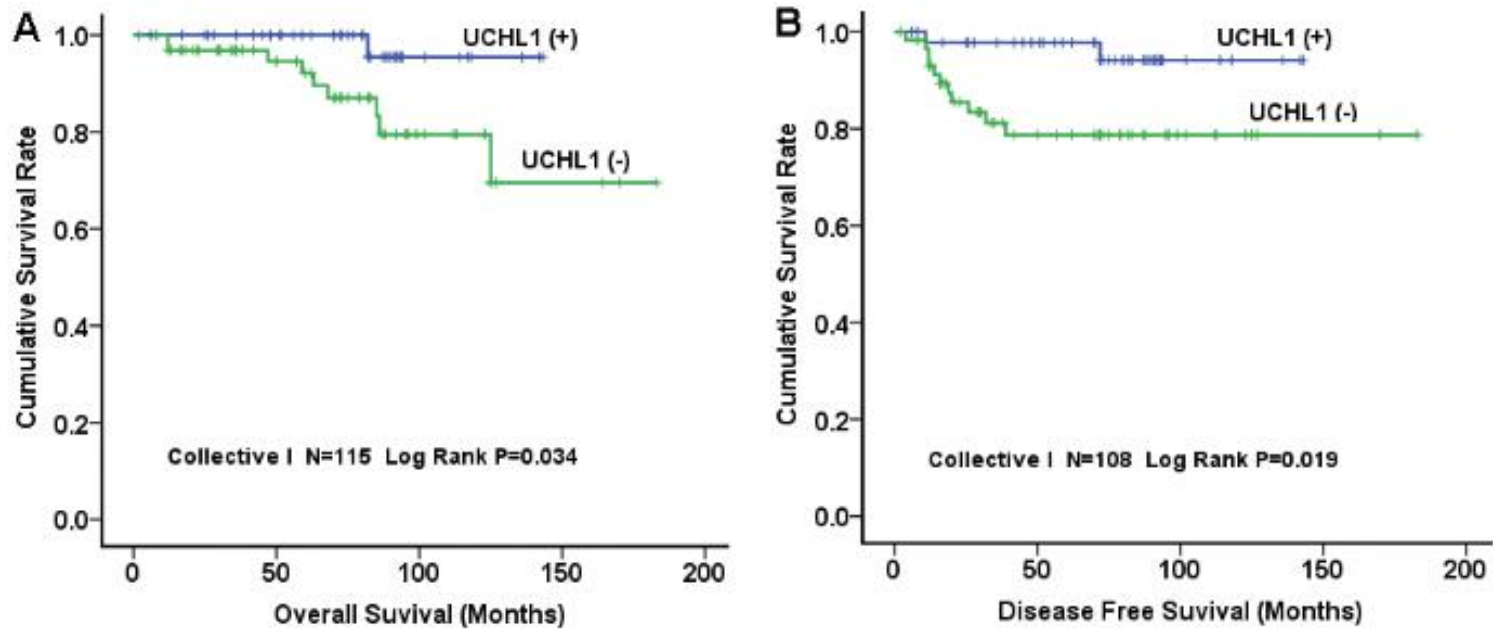

**Supplementary Figure S2.** The Expression of UCH-L1 and Survival in PNETs patients of collective I.

The expression of UCH-L1 in tumour significantly correlated with better overall survival (A) and disease free survival (B) in collective I.

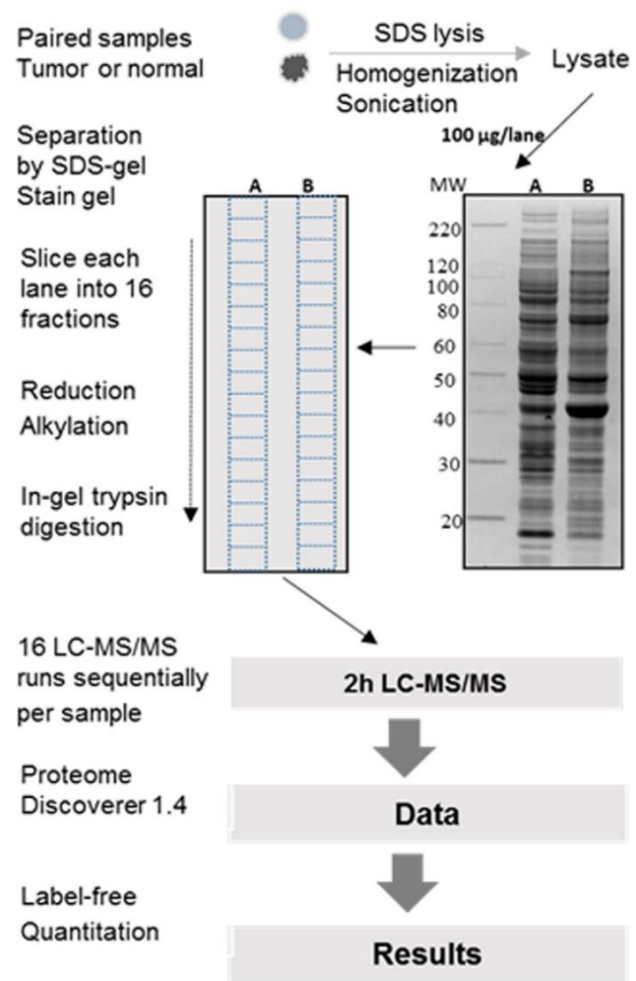

Supplementary Figure S3. Workflow for Proteomic Analysis

## Supplementary Methods

### Extraction, Separation and In-gel Digestion of Total Protein

Each tissue sample from 4 fresh frozen tumors and 4 paired pancreatic specimens (about 0.05 gram each sample) was ground in liquid nitrogen. The powder was lysed in 0.4 ml lyses buffer (20 mM Tris-HCl, 150 mM NaCl, 1 mM Na<sub>2</sub>EDTA, 1 mM EGTA, 1% Triton X-100 and protease inhibitor cocktail pill, pH 7.5) and 50  $\mu$ l of 10% SDS and 50  $\mu$ l of 1 M DTT were added into the buffer. The mixtures were sonicated to breakdown DNA further, and then incubated at 95 °C for 10 min. After centrifuged at 15,000  $\times$  g for 10 min, supernatants were collected and the protein concentrations determined by BCA™ Reducing Reagent compatible assay kit (Pierce/Thermo Scientific, Rockford, USA).

Equal amounts of protein (100  $\mu$ g) from each sample were loaded onto NuPAGE 4-12% Bis-Tris Gel (Life Technologies). After electrophoresis (90 min at 120V), the gel was stained with Simply Blue Safe Stain (Life Technologies), subsequently de-stained thoroughly.

For proteins digestion, the de-stained gel was washed with ion-free water 3 times, and sliced horizontally into 16 slices. Each slice was diced into tiny pieces (1–2 mm) and placed into 1.5 ml centrifuge tubes. Proteins in the gel were treated with DTT for reduction, then iodoacetamide for alkylation, and further digested by trypsin in 25 mM NH<sub>4</sub>HCO<sub>3</sub> solution. The digested proteins were extracted and dried, then reconstituted in 0.1% formic acid before performing nanospray LC/MS/MS analysis.

## Mass Spectrometer analysis

The resulting peptides from 16 fractions of each sample (4 tumor and 4 paired pancreas) were analyzed. Eight  $\mu\text{L}$  of each sample was loaded onto a peptide trap cartridge at a flow rate of 5  $\mu\text{L}/\text{min}$ . The trapped peptides were eluted onto a reversed-phase C18 Pico Frit column (New Objective, Woburn, state) using a linear gradient of acetonitrile (3-36%) in 0.1% formic acid. The elution duration was 110 min at a flow rate of 0.3  $\mu\text{L}/\text{min}$ . Eluted peptides from the PicoFrit column were ionized and sprayed into the mass spectrometer, using a Nanospray Flex Ion Source ES071 (Thermo) under the following settings: spray voltage, 1.6 kV, Capillary temperature, 250  $^{\circ}\text{C}$ .

The Q Exactive instrument was operated in the data dependent mode to automatically switch between full scan MS and MS/MS acquisition. Survey full scan MS spectra ( $m/z$ 300–2000) were acquired in the Orbitrap with 70,000 resolution ( $m/z$  200) after accumulation of ions to a  $1 \times 10^6$  target value based on predictive AGC from the previous full scan. The dynamic exclusion was set to 20 s. The 12 most intense multiply charged ions ( $z \geq 2$ ) were sequentially isolated and fragmented by higher-energy collisional dissociation (HCD) using normalized HCD collision energy 28% with an AGC target  $1e5$  and a maxima injection time of 100ms at 17,500 resolution.

## Antibodies and Methods for Immunohistochemical Staining

| Antibody              |                                                         | Company / City                                     | Catalogue number | Dilution | Antigen-retrieved method |
|-----------------------|---------------------------------------------------------|----------------------------------------------------|------------------|----------|--------------------------|
| Primary<br>antibodies | Anti-UCH-L1                                             | Santa Cruz Biotechnology / Santa Cruz              | sc-58594         | 1: 50    | heat retrieve            |
|                       | Anti-MAP1B                                              | Santa Cruz Biotechnology / Santa Cruz              | sc-58784         | 1: 400   | heat retrieve            |
|                       | Anti-MAP2                                               | Abnova / Taipei City                               | PAB3854          | 1:100    | heat retrieve            |
|                       | Anti-VCAN                                               | Abcam / Hong kong                                  | ab177480         | 1: 50    | heat retrieve            |
|                       | Anti-PDX-1                                              | Abcam / Hong kong                                  | ab47267          | 1: 400   | heat retrieve            |
|                       | Anti-CaSR                                               | Abcam / Hong kong                                  | ab62653          | 1: 50    | heat retrieve            |
|                       | Anti-CDK4                                               | Santa Cruz Biotechnology / Santa Cruz              | sc-23896         | 1: 50    | heat retrieve            |
|                       | Anti- $\alpha$ -internexin                              | Chemicon / Temecula                                | MAB5224          | 1:100    | heat retrieve            |
| second antibody       | HRP labeled anti-mouse / rabbit<br>IgG detection system | Zhongshan Golden Bridge Biotechnology /<br>Beijing | PV9000           | /        | /                        |

## Primers and Methods for Methylation Specific PCR

The promoter of the UCHL-1 gene (Genbank accession no. NC\_000004.12) was amplified by PCR focused on the -142 to +18 nucleotide (nt) region (+1 nt, transcription start site). Methylated primer and unmethylated primer were used to amplify DNA with and without methylation, respectively [49]. Touch down PCR was performed using a T1-Thermo-cycler (Biometra, Goettingen, Germany) as the following conditions.

Methylation-F: 5'-GTTCGGTCGTATTATTTTCGCGT-3';      Methylation-R: 5'-CTAACGAAACCGCCCAAAC-3'

Unmethylation-F: 5'-GTTTGGTTGTATTATTTTGTGT-3';      Unmethylation-R: 5'-CTAACAAAACCAACCAAAC-3'

### Methylation PCR

95°C 15 min to activate Hotstar enzyme

(94°C 40 sec — 61°C 35 sec — 72°C 35 sec) x 2 cycles

(94°C 40 sec — 60°C 35 sec — 72°C 35 sec) x 2 cycles

(94°C 40 sec — 59°C 35 sec — 72°C 35 sec) x 2 cycles

(94°C 40 sec — 58°C 35 sec — 72°C 35 sec) x 12 cycles

(94°C 40 sec — 56°C 35 sec — 72°C 35 sec) x 20 cycles

72°C 5 min, 4°C stop.

### Unmethylation PCR

95°C 15 min to activate Hotstar enzyme

(94°C 35 sec — 63°C 35 sec — 72°C 35 sec) x 2 cycles

(94°C 35 sec — 62°C 35 sec — 72°C 35 sec) x 2 cycles

(94°C 35 sec — 61°C 35 sec — 72°C 35 sec) x 2 cycles

(94°C 35 sec — 60°C 35 sec — 72°C 35 sec) x 30 cycles

72°C 5 min, 4°C stop



## Supplementary Table S1 Clinicopathological Data and IHC results

| Sample # | Collective | Tumor type  | Gender | Age | Grade | Ki-67 | Ki-67>2% | Mitosis /10 HPF | Location           | T | N | M | Stage | Tumor Size | Metastasis | LN metastasis | Distal metastasis | Malignant | Recurrence | Outcome             | Duration of follow up (months) | Duration of DFS (months) | INX T | INX N | UCLH1 T | UCLH1 N |
|----------|------------|-------------|--------|-----|-------|-------|----------|-----------------|--------------------|---|---|---|-------|------------|------------|---------------|-------------------|-----------|------------|---------------------|--------------------------------|--------------------------|-------|-------|---------|---------|
| 1        | 1          | Insulinoma  | F      | 39  |       |       |          |                 | tail               | 1 | 0 | 0 | 1     | 1.5        | no         | no            | no                | no        | no         | DFS                 | 114                            | 114                      | +     | -     | +       | -       |
| 2        | 1          | Gastrinoma  | F      | 45  | 2     | 5%    | yes      | 1               | body/tail          | 2 | 0 | 0 | 2a    | 2.5        | no         | no            | no                | yes       | yes        | AWD                 | 83                             | 20                       | -     | -     | -       | -       |
| 3        | 1          | Insulinoma  | F      | 31  | 2     | 3%    | yes      |                 | head               | 1 | 0 | 0 | 1     | 1.6        | no         | no            | no                | no        | no         | DFS                 | 89                             | 89                       | -     | -     | +       | -       |
| 4        | 1          | Insulinoma  | F      | 48  |       |       |          |                 | head               | 2 | 0 | 0 | 2a    | 3          | no         | no            | no                | no        | no         | DFS                 | 6                              | 6                        | -     | -     | +       | -       |
| 5        | 1          | Insulinoma  | M      | 15  | 2     | 5%    | yes      |                 | tail               | 2 | 0 | 0 | 2a    | 2          | no         | no            | no                | no        | no         |                     |                                |                          |       |       | -       | -       |
| 6        | 1          | Insulinoma  | F      | 17  | 2     | 8%    | yes      | 5.4             | head               | 4 | 1 | 0 | 3b    | 2.5        | yes        | yes           | no                | yes       | yes        | DOD                 | 12                             | 11                       | +     | -     | -       | -       |
| 7        | 1          | Insulinoma  |        |     |       |       |          |                 | lymph (metastasis) |   |   |   |       |            |            |               |                   |           |            |                     |                                |                          | -     | -     | -       | -       |
| 8        | 1          | Insulinoma  |        |     |       |       |          |                 | lymph (metastasis) |   |   |   |       |            |            |               |                   |           |            |                     |                                |                          |       |       | +       | -       |
| 9        | 1          | Insulinoma  | F      | 20  | 2     | >2%   | yes      |                 | tail               | 1 | 0 | 0 | 1     | 1.3        | no         | no            | no                | no        | no         | DFS                 | 56                             | 56                       | +     | -     | +       | -       |
| 10       | 1          | Insulinoma  | F      | 46  |       | <2%   | no       |                 | head               | 1 | 0 | 0 | 1     | 1          | no         | no            | no                | no        | no         |                     |                                |                          | +     | -     | +       | -       |
| 11       | 1          | NF          | F      | 67  | 2     | <2%   | no       | 8               | head               | 3 | 0 | 0 | 2b    | 4.5        | no         | no            | no                | no        | no         | DFS                 | 102                            | 102                      | -     | -     | +       | -       |
| 12       | 1          | Insulinoma  | M      | 64  | 1     | 1.7%  | no       | 1               | head               | 3 | 0 | 0 | 2b    | 5          | no         | no            | no                | no        | no         |                     |                                |                          | -     | -     | +       | -       |
| 13       | 1          | Insulinoma  | F      | 41  |       |       |          | 1               | tail               | 1 | 0 | 0 | 1     | 1          | no         | no            | no                | no        | no         | DFS                 | 93                             | 93                       | +     | -     | +       | -       |
| 14       | 1          | NF          | F      | 60  | 1     | <2%   | no       | 0.2             | neck               | 2 | 0 | 0 | 2a    | 3          | no         | no            | no                | no        | no         | DFS                 | 70                             | 70                       | -     | -     | +       | -       |
| 15       | 1          | Insulinoma  | M      | 32  | 1     | 0.1%  | no       | <2              | tail               | 1 | 0 | 0 | 1     | 1          | no         | no            | no                | no        | no         | DFS                 | 48                             | 48                       | -     | -     | +       | -       |
| 16       | 1          | NF          | M      | 41  | 2     | 5%    | yes      |                 | head               | 3 | 0 | 0 | 2b    | 8          | no         | no            | no                | no        | no         | DFS                 | 30                             | 30                       | -     | -     | -       | -       |
| 17       | 1          | Insulinoma  | M      | 47  |       | <2%   | no       |                 | body/tail          | 1 | 0 | 0 | 1     | 1.8        | no         | no            | no                | no        | no         |                     |                                |                          | +     | -     | -       | -       |
| 18       | 1          | Insulinoma  | F      | 42  |       | <2%   | no       |                 | neck               | 1 | 0 | 0 | 1     | 1.5        | no         | no            | no                | no        | no         |                     |                                |                          | +     | -     | +       | -       |
| 19       | 1          | Insulinoma  | M      | 39  | 1     | 0     | no       |                 | head               | 2 | 0 | 0 | 2a    | 2          | no         | no            | no                | no        | no         | DFS                 | 83                             | 83                       | +     | -     | +       | -       |
| 20       | 1          | Gastrinoma  | F      | 32  |       |       |          |                 | liver (metastasis) | 3 | 0 | 1 | 4     | 5.2        | yes        | no            | yes               | yes       | no         |                     | 127                            | 127                      | -     | -     | -       | -       |
| 21       | 1          | Insulinoma  | F      | 52  |       |       |          |                 | head/tail          | 2 | 0 | 0 | 2a    | 2          | no         | no            | no                | no        | no         | DFS                 | 71                             | 71                       | -     | -     | -       | -       |
| 22       | 1          | Insulinoma  | M      | 67  | 2     | >2%   | yes      |                 | body/tail          | 1 | 0 | 0 | 1     | 1.2        | no         | no            | no                | no        | no         | DFS                 | 73                             | 73                       | +     | -     | +       | -       |
| 23       | 1          | NF          | M      | 34  |       |       |          |                 | head/neck          | 2 | 0 | 0 | 2a    | 3          | no         | no            | no                | no        | no         |                     | 127                            | 127                      | +     | -     | -       | -       |
| 24       | 2          | Glucagonoma | M      | 67  | 2     | 10%   | yes      |                 | body/tail          | 3 | 0 | 1 | 4     | 6.1        | yes        | no            | yes               | yes       | yes        | AWD                 | 73                             | 41                       | -     | -     | -       | -       |
| 25       | 1          | Gastrinoma  | F      | 52  | 1     | <0.5% | no       | <2              | duodenum           | 1 | 1 | 0 | 3b    | 1.5        | yes        | yes           | no                | yes       | no         | DFS                 | 79                             | 79                       | -     | -     | -       | -       |
| 26       | 1          | Insulinoma  | F      | 46  | 1     | <2%   | no       | 0               | head               | 1 | 0 | 0 | 1     | 1.5        | no         | no            | no                | no        | no         | DFS                 | 95                             | 95                       | +     | -     | -       | -       |
| 27       | 1          | Insulinoma  | F      | 40  |       |       |          |                 | head               | 2 | 0 | 0 | 2a    | 2          | no         | no            | no                | no        | no         | DFS                 | 6                              | 6                        | +     | -     | +       | -       |
| 28       | 1          | NF          | F      | 69  |       |       |          |                 | head               | 1 | 0 | 0 | 1     | 1.5        | no         | no            | no                | no        | no         | DUC                 | 94                             | 9                        | +     | -     | +       | -       |
| 29       | 1          | Insulinoma  | F      | 46  | 1     | <2%   | no       | <2              | body/tail          | 1 | 0 | 0 | 1     | 1.5        | no         | no            | no                | no        | no         | DFS                 | 72                             | 72                       | +     | -     | -       | -       |
| 30       | 1          | Insulinoma  | M      | 35  | 2     |       |          | 2               | body/tail          | 1 | 0 | 0 | 1     | 1.5        | no         | no            | no                | no        | no         | DFS                 | 8                              | 8                        | +     | -     | +       | -       |
| 31       | 1          | NF          | M      | 33  | 2     | 1.00% | no       | 3               | tail               | 3 | 1 | 0 | 3b    | 7          | yes        | yes           | no                | yes       | no         | DFS                 | 29                             | 29                       | +     | -     | -       | -       |
| 32       | 1          | Gastrinoma  | M      | 45  | 2     | 2.50% | yes      | 0               | body/tail          | 3 | 0 | 1 | 4     | 3.5        | yes        | no            | yes               | yes       | yes        | AWD                 | 36                             |                          | +     | -     | -       | -       |
| 33       | 1          | Gastrinoma  |        |     |       | 2%    | no       |                 | liver (metastasis) |   |   |   |       |            |            |               |                   |           |            |                     |                                |                          | +     | -     | -       | -       |
| 34       | 1          | NF          | F      | 51  | 1     | 0.50% | no       | 0               | body/tail          | 3 | 1 | 1 | 4     | 6          | yes        | yes           | yes               | yes       | yes        | DOD                 | 86                             | 39                       | -     | -     | -       | -       |
| 35       | 1          | NF          |        |     |       |       |          |                 | liver (metastasis) |   |   |   |       |            |            |               |                   |           |            |                     |                                |                          | -     | -     | -       | -       |
| 36       | 1          | Insulinoma  | F      | 73  |       |       |          |                 | body               | 2 | 0 | 0 | 2a    | 2          | no         | no            | no                | no        | no         |                     |                                |                          | +     | -     | +       | -       |
| 37       | 1          | NF          | F      | 36  |       |       |          |                 | body/tail          | 1 | 0 | 1 | 4     | 1.5        | yes        | no            | yes               | yes       | no         |                     |                                |                          | -     | -     | -       | -       |
| 38       | 1          | Insulinoma  | M      | 52  | 1     | <2%   | no       | 1.2             | head               | 2 | 0 | 0 | 2a    | 2.5        | no         | no            | no                | no        | no         | DFS                 | 25                             | 25                       | +     | -     | +       | -       |
| 39       | 1          | Insulinoma  | M      | 52  | 1     | 0.10% | no       | <2              | body/tail          | 1 | 0 | 0 | 1     | 1.3        | no         | no            | no                | no        | no         | survive (unknown st | 48                             |                          | -     | -     | +       | -       |
| 40       | 1          | Insulinoma  | M      | 52  | 2     | 1%    | no       | 2               | tail               | 2 | 0 | 0 | 2a    | 2          | no         | no            | no                | no        | no         | DFS                 | 45                             | 45                       | +     | -     | +       | -       |
| 41       | 1          | Insulinoma  | F      | 45  | 1     | 1%    | no       | <2              | head               | 1 | 0 | 0 | 1     | 1.5        | no         | no            | no                | no        | no         |                     |                                |                          | +     | -     | -       | -       |
| 42       | 1          | Gastrinoma  | F      | 51  | 2     | 3%    | yes      | 3               | head/neck          | 3 | 0 | 1 | 4     | 4.5        | yes        | no            | yes               | yes       | yes        | DOD                 | 125                            | 12                       | +     | -     | -       | -       |
| 43       | 1          | Insulinoma  | F      | 49  | 1     | <1%   | no       | 0.5             | body/tail          | 2 | 0 | 0 | 2a    | 2          | no         | no            | no                | no        | no         | DFS                 | 102                            | 102                      | -     | -     | -       | -       |
| 44       | 1          | Insulinoma  | M      | 71  | 1     | <1%   | no       | <2              | head               | 2 | 0 | 0 | 2a    | 2          | no         | no            | no                | no        | no         | DFS                 | 82                             | 82                       | +     | -     | +       | -       |
| 45       | 1          | NF          | M      | 53  |       |       |          |                 | liver (metastasis) | x | 0 | 1 | 4     |            | yes        | no            | yes               | yes       | yes        | DOD                 | 47                             | 32                       | -     | -     | -       | -       |
| 46       | 1          | Insulinoma  | F      | 37  | 1     | 2.00% | no       | 0               | neck               | 1 | 0 | 0 | 1     | 1          | no         | no            | no                | no        | no         | DFS                 | 94                             | 94                       | +     | -     | +       | -       |
| 47       | 1          | NF          | M      | 36  | 1     | <2%   | no       | 0.4             | tail               | 2 | 0 | 0 | 2a    | 4          | no         | no            | no                | no        | no         | DFS                 | 90                             | 90                       | +     | +     | +       | -       |
| 48       | 1          | Insulinoma  | F      | 49  |       | 1%    | no       |                 | neck               | 2 | 0 | 0 | 2a    | 2          | no         | no            | no                | no        | no         |                     |                                |                          |       |       | +       | -       |

| Sample # | Collective | Tumor type  | Gender | Age | Grade | Ki-67 | Ki-67>2% | Mitosis /10 HPF | Location           | T | N | M | Stage | Tumor Size | Metastasis | LN metastasis | Distal metastasis | Malignant | Recurrence | Outcome             | Duration of follow up (months) | Duration of DFS (months) | INX T | INX N | UCLH1 T | UCLH1 N |   |
|----------|------------|-------------|--------|-----|-------|-------|----------|-----------------|--------------------|---|---|---|-------|------------|------------|---------------|-------------------|-----------|------------|---------------------|--------------------------------|--------------------------|-------|-------|---------|---------|---|
| 49       | 1          | NF          | F      | 52  |       |       |          |                 | neck               | 2 | 0 | 0 | 2a    | 4          | no         | no            | no                | no        | no         | DFS                 | 2                              | 2                        | +     | -     | +       | -       |   |
| 50       | 1          | Insulinoma  | M      | 31  |       | <2%   | no       |                 | head               | 1 | 0 | 0 | 1     | 1.2        | no         | no            | no                | no        |            |                     |                                |                          | +     | -     | -       | -       |   |
| 51       | 1          | Insulinoma  | M      | 46  | 2     | 3%    | yes      |                 | tail               | 1 | 0 | 0 | 1     | 1.2        | no         | no            | no                | no        |            |                     |                                |                          |       |       | +       | -       |   |
| 52       | 1          | Insulinoma  | F      | 49  | 2     | 3%    | yes      | 0.3             | head               | 1 | 0 | 0 | 1     | 1.2        | no         | no            | no                | no        | no         | DFS                 | 42                             | 42                       | +     | -     | +       | -       |   |
| 53       | 1          | Insulinoma  | F      | 51  | 1     | <1%   | no       | <2              | body/tail          | 2 | 0 | 0 | 2a    | 3          | no         | no            | no                | no        | no         | DFS                 | 26                             | 26                       | -     | -     | +       | -       |   |
| 54       | 1          | Insulinoma  | F      | 46  |       | <1%   | no       |                 | head               | 1 | 0 | 0 | 1     | 1          | no         | no            | no                | no        |            |                     |                                |                          |       |       | +       | -       |   |
| 55       | 1          | Insulinoma  | F      | 59  | 2     | >2%   | yes      |                 | neck               | 2 | 0 | 0 | 2a    | 2.9        | no         | no            | no                | no        | no         | DFS                 | 87                             | 87                       | +     | -     | -       | -       |   |
| 56       | 1          | Insulinoma  | M      | 53  | 1     | <2%   | no       | <2              | body/tail          | 1 | 0 | 0 | 1     | 1.5        | no         | no            | no                | no        | no         | DFS                 | 82                             | 82                       | +     | -     | -       | -       |   |
| 57       | 1          | Insulinoma  | F      | 24  |       |       |          |                 | body/tail          | 2 | 0 | 0 | 2a    | 2          | no         | no            | no                | no        |            |                     |                                |                          |       |       | +       | -       |   |
| 58       | 1          | NF          | F      | 42  |       |       |          |                 | head               | 3 | 0 | 0 | 2b    | 5          | no         | no            | no                | no        |            |                     |                                |                          | +     | -     | -       | -       |   |
| 59       | 1          | Insulinoma  | M      | 41  | 1     | 1%    | no       | <2              | body/tail          | 1 | 0 | 0 | 1     | 1          | no         | no            | no                | no        | no         | DFS                 | 23                             | 23                       | +     | -     | -       | -       |   |
| 60       | 1          | NF          | F      | 29  |       |       |          |                 | head               | 2 | 0 | 0 | 2a    | 3          | no         | no            | no                | no        |            |                     |                                |                          | -     | -     | -       | -       |   |
| 61       | 1          | Insulinoma  | M      | 46  |       |       |          |                 | head               | 2 | 0 | 0 | 2a    | 3          | no         | no            | no                | no        |            |                     |                                |                          |       |       | +       | -       |   |
| 62       | 1          | Insulinoma  | F      | 44  |       | <2%   | no       |                 | head               | 2 | 0 | 0 | 2a    | 2          | no         | no            | no                | no        | no         | DFS                 | 83                             | 83                       | +     | -     | -       | -       |   |
| 63       | 1          | Insulinoma  | M      | 52  |       |       |          |                 | head               | 1 | 0 | 0 | 1     | 1          | no         | no            | no                | no        |            |                     |                                |                          | +     | -     | +       | -       |   |
| 64       | 1          | NF          | M      | 72  | 2     | >2%   | yes      |                 | body               | 1 | 0 | 0 | 1     | 1.7        | no         | no            | no                | no        | no         | DFS                 | 123                            | 123                      | +     | -     | -       | -       |   |
| 65       | 1          | Insulinoma  | M      | 48  |       | <2%   | no       |                 | head               | 2 | 0 | 0 | 2a    | 2          | no         | no            | no                | no        | no         | DFS                 | 80                             | 80                       | +     | -     | +       | -       |   |
| 66       | 1          | Insulinoma  | M      | 30  | 2     | <1%   | no       | 4               | body               | 2 | 0 | 0 | 2a    | 2          | no         | no            | no                | no        | no         | DFS                 | 94                             | 94                       | +     | -     | +       | -       |   |
| 67       | 1          | Insulinoma  | F      | 51  | 2     | >2%   | yes      |                 | tail               | 1 | 0 | 0 | 1     | 1.8        | no         | no            | no                | no        | no         | DFS                 | 48                             | 48                       | +     | -     | +       | -       |   |
| 68       | 1          | Insulinoma  | M      | 50  | 2     | 8%    | yes      | 3.5             | head               | 2 | 0 | 1 | 4     | 3          | yes        | no            | yes               | yes       | yes        | DOD                 | 12                             |                          | -     | -     | -       | -       |   |
| 69       | 1          | Insulinoma  | M      | 48  |       |       |          |                 | head               | 2 | 0 | 0 | 2a    | 3          | no         | no            | no                | no        | no         |                     |                                |                          |       | +     | -       | -       |   |
| 70       | 1          | Gastrinoma  | M      | 43  |       |       |          |                 | head               | 1 | 1 | 1 | 4     | 1.5        | yes        | yes           | yes               | yes       |            |                     |                                |                          |       |       | -       | -       |   |
| 71       | 1          | Glucagonoma | F      | 51  | 2     | 8%    | yes      | 0               | body/tail          | 3 | 0 | 1 | 4     | 8          | yes        | no            | yes               | yes       | yes        | DOD                 | 85                             | 12                       | +     | -     | -       | -       |   |
| 72       | 1          | Insulinoma  | F      | 31  | 2     | >2%   | yes      |                 | head               | 2 | 0 | 0 | 2a    | 2.2        | no         | no            | no                | no        | no         | DFS                 | 51                             | 51                       | +     | -     | +       | -       |   |
| 73       | 1          | Insulinoma  | F      | 27  |       |       |          |                 | body               | 1 | 0 | 0 | 1     | 1.5        | no         | no            | no                | no        |            |                     |                                |                          |       |       | +       | -       |   |
| 74       | 1          | Insulinoma  | M      | 53  | 1     | 1%    | no       | <2              | head               | 2 | 0 | 0 | 2a    | 2.5        | no         | no            | no                | no        | no         | DFS                 | 30                             | 30                       | -     | -     | -       | -       |   |
| 75       | 1          | Insulinoma  | F      | 60  |       |       |          |                 | head               | 1 | 0 | 0 | 1     | 1.8        | no         | no            | no                | no        | no         | DFS                 | 18                             | 18                       | +     | -     | -       | -       |   |
| 76       | 1          | Insulinoma  | F      | 51  | 1     | <1%   | no       | <2              | head               | 1 | 0 | 0 | 1     | 1.3        | no         | no            | no                | no        | no         | DFS                 | 12                             | 12                       | +     | -     | -       | -       |   |
| 77       | 1          | VIPoma      |        |     |       |       |          |                 | liver (metastasis) |   |   |   |       | 8          |            |               |                   |           |            |                     |                                |                          |       | -     | -       | +       | - |
| 78       | 1          | VIPoma      | M      | 41  | 2     | 3%    | yes      | 0               | body/tail          | 2 | 1 | 1 | 4     | 3.5        | yes        | yes           | yes               | yes       | yes        | AWD                 | 92                             | 26                       | -     | -     | -       | -       |   |
| 79       | 1          | Insulinoma  | M      | 58  | 1     | <2%   | no       | 0.4             | head               | 2 | 0 | 0 | 2a    | 3          | no         | no            | no                | no        | no         | DFS                 | 123                            | 123                      | -     | -     | -       | -       |   |
| 80       | 1          | NF          | F      | 33  | 2     | 10%   | yes      | 0               | body/tail          | 2 | 0 | 1 | 4     | 2.3        | yes        | no            | yes               | yes       | yes        | AWD                 | 22                             | 16                       | -     | -     | -       | -       |   |
| 81       | 1          | Insulinoma  | M      | 66  | 2     | >2%   |          |                 | body/tail          | 4 | 0 | 1 | 4     | 5          | yes        | no            | yes               | yes       |            |                     |                                |                          | -     | -     | -       | -       |   |
| 82       | 1          | Insulinoma  | M      | 58  | 1     | <2%   | no       | <2              | tail               | 1 | 0 | 0 | 1     | 1.5        | no         | no            | no                | no        | no         | DFS                 | 93                             | 93                       | +     | -     | +       | -       |   |
| 83       | 1          | Insulinoma  | F      | 55  | 1     | 1%    | no       | 0               | head               | 1 | 0 | 0 | 1     | 1          | no         | no            | no                | no        | no         | DFS                 | 96                             | 96                       | +     | -     | -       | -       |   |
| 84       | 1          | Insulinoma  | M      | 36  | 1     | <2%   | no       | 0               | tail               | 2 | 0 | 0 | 2a    | 2          | no         | no            | no                | no        | no         | DFS                 | 28                             | 28                       | +     | -     | +       | -       |   |
| 85       | 1          | Insulinoma  | M      | 38  | 1     | 1%    | no       | <2              | head               | 1 | 0 | 0 | 1     | 1.6        | no         | no            | no                | no        |            |                     |                                |                          | +     | -     | -       | -       |   |
| 86       | 1          | NF          | F      | 57  |       |       |          |                 | body/tail          | 2 | 0 | 0 | 2a    | 4          | no         | no            | no                | no        |            |                     |                                |                          | +     | -     | +       | -       |   |
| 87       | 1          | Insulinoma  | M      | 39  |       | <2%   | no       |                 | neck               | 1 | 0 | 0 | 1     | 1          | no         | no            | no                | no        |            |                     |                                |                          | +     | -     | +       | -       |   |
| 88       | 1          | Insulinoma  | F      | 71  | 1     | <2%   | no       | <2              | body/tail          | 1 | 0 | 0 | 1     | 1          | no         | no            | no                | no        | no         | DFS                 | 99                             | 99                       | -     | -     | -       | -       |   |
| 89       | 1          | Insulinoma  | F      | 42  | 2     | >2%   | yes      |                 | tail               | 1 | 0 | 0 | 1     | 1.5        | no         | no            | no                | no        | no         | DFS                 | 91                             | 91                       | +     | -     | +       | -       |   |
| 90       | 1          | Gastrinoma  | M      | 39  | 2     | 9%    | yes      | 4.5             | head/neck          | 2 | 0 | 1 | 4     | 3.5        | yes        | no            | yes               | yes       | yes        | AWD                 | 164                            | 4                        | +     | -     | -       | -       |   |
| 91       | 1          | Insulinoma  | M      | 29  | 1     | 1.1%  | no       | <2              | body/tail          | 2 | 0 | 0 | 2a    | 2.2        | no         | no            | no                | no        | no         | DFS                 | 92                             | 92                       | +     | -     | +       | -       |   |
| 92       | 1          | Insulinoma  | F      | 71  | 1     | 1.5%  | no       | <2              | head               | 1 | 0 | 0 | 1     | 1.2        | no         | no            | no                | no        | no         | DFS                 | 72                             | 72                       | +     | -     | +       | -       |   |
| 93       | 1          | Insulinoma  | F      | 46  | 1     | 0.10% | no       | 1               | neck               | 1 | 0 | 0 | 1     | 1.2        | no         | no            | no                | no        | no         | DFS                 | 88                             | 88                       | +     | -     | +       | -       |   |
| 94       | 1          | Insulinoma  | F      | 43  | 1     | 1.2%  | no       | <2              | body/tail          | 1 | 0 | 0 | 1     | 1.1        | no         | no            | no                | no        | no         | DFS                 | 73                             | 73                       | +     | -     | -       | -       |   |
| 95       | 1          | NF          | F      | 46  | 2     | 7%    | yes      |                 | body/tail          | 2 | 0 | 0 | 2a    | 2          | no         | no            | no                | no        | no         | DFS                 | 59                             | 59                       | +     | -     | +       | -       |   |
| 96       | 1          | Insulinoma  | F      | 63  | 1     | 0.20% | no       | <2              | body/tail          | 1 | 0 | 0 | 1     | 1.5        | no         | no            | no                | no        |            | survive (unknown st | 50                             |                          | -     | -     | -       | -       |   |
| 97       | 1          | Insulinoma  | F      | 36  |       |       |          |                 | head               | 2 | 0 | 1 | 4     | 4          | yes        | no            | yes               | yes       |            |                     |                                |                          | +     | -     | +       | -       |   |
| 98       | 1          | Gastrinoma  | F      | 37  | 2     | 2.60% | yes      | 0.5             | body/tail          | 2 | 1 | 1 | 4     | 4          | yes        | yes           | yes               | yes       | yes        | DOD                 | 63                             | 19                       | -     | -     | -       | -       |   |

| Sample # | Collective | Tumor type  | Gender | Age | Grade | Ki-67 | Ki-67>2% | Mitosis /10 HPF | Location       | T | N | M | Stage | Tumor Size | Metastasis | LN metastasis | Distal metastasis | Malignant | Recurrence | Outcome | Duration of follow up (months) | Duration of DFS (months) | INX T | INX N | UCLH1 T | UCLH1 N |
|----------|------------|-------------|--------|-----|-------|-------|----------|-----------------|----------------|---|---|---|-------|------------|------------|---------------|-------------------|-----------|------------|---------|--------------------------------|--------------------------|-------|-------|---------|---------|
| 99       | 1          | Insulinoma  | F      | 26  | 1     | 0.10% | no       | 0               | head/body/tail | 1 | 0 | 0 | 1     | 1.5        | no         | no            | no                | no        | no         | DFS     | 92                             | 92                       | +     | -     | +       | -       |
| 100      | 1          | Insulinoma  | M      | 66  | 1     | 0.10% | no       | 1.2             | body/tail      | 2 | 0 | 0 | 2a    | 2          | no         | no            | no                | no        | no         | DFS     | 38                             | 38                       | -     | -     | -       | -       |
| 101      | 1          | Insulinoma  | M      | 41  | 1     | <2%   | no       | 0.2             | head           | 2 | 0 | 0 | 2a    | 2          | no         | no            | no                | no        | no         | DFS     |                                |                          | +     | -     | +       | -       |
| 102      | 1          | Gastrinoma  | F      | 69  | 2     | 0     | no       | 3.3             | stomach        | 3 | 1 | 0 | 3b    | 4.5        | yes        | yes           | no                | yes       | no         | DFS     | 70                             | 70                       | -     | -     | -       | -       |
| 103      | 1          | Insulinoma  | M      | 42  | 1     | 0.10% | no       | <2              | head           | 2 | 0 | 0 | 2a    | 2.5        | no         | no            | no                | no        | no         | DFS     | 96                             | 96                       | -     | -     | -       | -       |
| 104      | 1          | Insulinoma  | F      | 20  | 2     | >2%   | yes      |                 | tail           | 2 | 0 | 0 | 2a    | 3.5        | no         | no            | no                | no        | no         | DFS     | 87                             | 87                       | +     | -     | +       | -       |
| 105      | 1          | Insulinoma  | M      | 37  | 2     | 3.5%  | yes      |                 | body/tail      | 1 | 0 | 0 | 1     | 1.8        | no         | no            | no                | no        | no         | DFS     | 16                             | 16                       | +     | -     | -       | -       |
| 106      | 1          | NF          | F      | 40  | 1     | 1%    | no       | 0.7             | head           | 2 | 0 | 0 | 2a    | 2.5        | no         | no            | no                | no        | no         | DFS     | 75                             | 75                       | -     | -     | -       | -       |
| 107      | 1          | Insulinoma  | F      | 74  | 1     | 1%    | no       | <2              | body/tail      | 1 | 0 | 0 | 1     | 1.5        | no         | no            | no                | no        | no         | DFS     | 70                             | 70                       | +     | -     | +       | -       |
| 108      | 1          | Insulinoma  | F      | 42  | 1     | <2%   | no       | <2              | body/tail      | 1 | 0 | 0 | 1     | 1.3        | no         | no            | no                | no        | no         | DFS     | 170                            | 170                      | -     | -     | -       | -       |
| 109      | 1          | Insulinoma  | F      | 59  | 1     | 1%    | no       | <2              | head           | 1 | 0 | 0 | 1     | 1.5        | no         | no            | no                | no        |            | DFS     |                                |                          | +     | -     | -       | -       |
| 110      | 1          | Insulinoma  | F      | 33  | 2     | <1%   | no       | 6               | body           | 3 | 1 | 0 | 3b    | 2.2        | yes        | yes           | no                | yes       | no         | DFS     | 52                             | 52                       | +     | -     | +       | -       |
| 111      | 1          | Insulinoma  | F      | 56  | 1     | <2%   | no       | <2              | body/tail      | 1 | 0 | 0 | 1     | 1.5        | no         | no            | no                | no        | no         | DFS     | 83                             | 83                       | +     | -     | +       | -       |
| 112      | 1          | Insulinoma  | F      | 40  | 1     | <1%   | no       | <2              | head           | 1 | 0 | 0 | 1     | 1.5        | no         | no            | no                | no        | no         | DFS     | 62                             | 62                       | +     | -     | +       | -       |
| 113      | 1          | NF          | M      | 37  | 1     | 1.50% | no       | 1.5             | body/tail      | 3 | 0 | 1 | 4     | 14         | yes        | no            | yes               | yes       | yes        | AWD     | 60                             | 14                       | -     | -     | -       | -       |
| 114      | 1          | NF          | F      | 30  | 1     | 0     | no       | 0.7             | tail           | 3 | 0 | 0 | 2b    | 6          | no         | no            | no                | no        | no         | DFS     | 113                            | 113                      | -     | -     | -       | -       |
| 115      | 1          | Insulinoma  | M      | 62  | 1     | 1.50% | no       | <2              | body/tail      | 2 | 0 | 0 | 2a    | 2          | no         | no            | no                | no        | no         | DFS     | 17                             | 17                       | -     | -     | +       | -       |
| 116      | 1          | Insulinoma  | F      | 66  | 1     | <2%   | no       | 0               | head           | 2 | 0 | 0 | 2a    | 2          | no         | no            | no                | no        | no         | DFS     | 21                             | 21                       | +     | -     | -       | -       |
| 117      | 1          | Insulinoma  | F      | 24  | 2     | 5%    | yes      |                 | head           | 1 | 0 | 0 | 1     | 1.2        | no         | no            | no                | no        |            | DFS     |                                |                          | +     | -     | -       | -       |
| 118      | 1          | Glucagonoma | F      | 45  | 1     | 0     | no       | 0.5             | body/tail      | 2 | 0 | 1 | 4     | 2.5        | yes        | no            | yes               | yes       |            | DOD     | 68                             |                          | -     | -     | -       | -       |
| 119      | 1          | Insulinoma  | F      | 25  | 1     | 1.50% | no       | <2              | head           | 1 | 0 | 0 | 1     | 1.5        | no         | no            | no                | no        | no         | DFS     | 75                             | 75                       | +     | -     | +       | -       |
| 120      | 1          | Glucagonoma | F      | 51  | 2     | 4.50% | yes      | 1.25            | body/tail      | 3 | 0 | 1 | 4     | 6          | yes        | no            | yes               | yes       | yes        | AWD     | 117                            | 72                       | -     | -     | +       | -       |
| 121      | 1          | NF          | F      | 29  |       | <2%   | no       |                 | head           | 2 | 0 | 0 | 2a    | 4          | no         | no            | no                | no        | no         | DFS     |                                |                          | -     | -     | +       | -       |
| 122      | 2          | NF          | F      | 33  | 2     | 5%    | yes      |                 | body/tail      | 4 | 0 | 0 | 3a    | 5.5        | no         | no            | no                | yes       | yes        | AWD     | 16                             | 71                       | -     | -     | +       | -       |
| 123      | 2          | NF          | F      | 17  | 1     | <2%   | no       | 0               |                | 3 | 0 | 0 | 2b    | 9          | no         | no            | no                | no        |            | DFS     |                                |                          | -     | -     | -       | -       |
| 124      | 2          | NF          | M      | 33  | 1     | <1%   | no       | <2              |                | 3 | 1 | 1 | 4     | 6          | yes        | yes           | yes               | yes       |            | DFS     |                                |                          | -     | -     | -       | -       |
| 125      | 1          | Glucagonoma | F      | 45  | 1     | 1.20% | no       | 1               | body/tail      | 3 | 0 | 1 | 4     | 4.5        | yes        | yes           | yes               | yes       | yes        | DOD     | 82                             | 11                       | -     | -     | +       | -       |
| 126      | 2          | NF          | F      | 64  |       |       |          |                 | tail           | 3 | 0 | 0 | 2b    | 11         | no         | no            | no                | no        | no         | DFS     |                                |                          | -     | -     | -       | -       |
| 127      | 2          | Insulinoma  | M      | 85  | 2     | 10%   | yes      | 5               | body           | 3 | 0 | 1 | 4     | 6.1        | yes        | no            | yes               | yes       | yes        | DOD     | 46                             | 35                       | -     | -     | +       | -       |
| 128      | 2          | NF          | F      | 47  | 1     | 0.5%  | no       | 1               | neck           | 3 | 0 | 0 | 2b    | 5          | no         | no            | no                | no        | no         | DFS     | 60                             | 60                       | -     | -     | -       | -       |
| 129      | 2          | NF          | F      | 84  | 1     | <2%   | no       | 0               | head           | 3 | 0 | 0 | 2b    | 4.3        | no         | no            | no                | no        | no         | DUC     | 12                             | 12                       | +     | -     | -       | -       |
| 130      | 2          | NF          | F      | 55  | 2     |       |          | 5               | tail           | 3 | 0 | 0 | 2b    | 10         | no         | no            | no                | no        | no         | DFS     | 133                            | 133                      | +     | -     | +       | -       |
| 131      | 2          | NF          | F      | 65  | 1     | <2%   | no       | 0               | head           | 3 | 0 | 0 | 2b    | 5.2        | no         | no            | no                | no        | no         | DUC     | 101                            | 101                      | -     | -     | -       | -       |
| 132      | 2          | NF          | F      | 58  | 1     | <2%   | no       | 0               | tail           | 1 | 0 | 0 | 1     | 1.2        | no         | no            | no                | no        | no         | DFS     | 140                            | 140                      | +     | -     | +       | -       |
| 133      | 2          | NF          | F      | 44  | 2     |       |          | 5               | head           | 2 | 1 | 0 | 3b    | 3.2        | yes        | yes           | no                | yes       | yes        | DOD     | 105                            | 34                       | -     | -     | +       | -       |
| 134      | 2          | NF          | M      | 61  | 2     |       |          | 5               | head           | 2 | 0 | 0 | 2a    | 4          | no         | no            | no                | no        | no         | DFS     | 13                             | 13                       | +     | -     | -       | -       |
| 135      | 2          | NF          | F      | 63  | 1     | <2%   | no       | 0               | tail           | 2 | 0 | 0 | 2a    | 3          | no         | no            | no                | no        | no         | DFS     | 123                            | 123                      | -     | -     | -       | -       |
| 136      | 2          | NF          | F      | 48  | 1     | <2%   | no       | 0               | body/tail      | 3 | 1 | 0 | 3b    | 4.4        | yes        | yes           | no                | yes       | no         | DFS     | 118                            | 118                      | -     | -     | -       | -       |
| 137      | 2          | NF          | M      | 45  | 2     |       |          | 7               | head           | 3 | 0 | 0 | 2b    | 4.5        | no         | no            | no                | yes       | yes        | DOD     | 72                             | 69                       | -     | -     | -       | -       |
| 138      | 2          | NF          | M      | 42  | 1     | <2%   | no       | 1               | head           | 2 | 0 | 0 | 2a    | 3.1        | no         | no            | no                | yes       | yes        | DOD     | 87                             | 31                       | +     | -     | -       | -       |
| 139      | 2          | NF          | F      | 80  | 1     | <2%   | no       | 0               | head           | 2 | 0 | 0 | 2a    | 2.5        | no         | no            | no                | no        | no         | DFS     | 106                            | 106                      | -     | -     | +       | -       |
| 140      | 2          | VIPoma      | F      | 64  | 1     | <2%   | no       | 0               | head           | 3 | 0 | 0 | 2b    | 4.5        | no         | no            | no                | no        | no         | DFS     | 137                            | 137                      | -     | -     | -       | -       |
| 141      | 2          | NF          | F      | 75  | 1     | <2%   | no       | 0               | body           | 2 | 0 | 0 | 2a    | 3.3        | no         | no            | no                | no        | no         | DFS     | 36                             | 36                       | -     | -     | -       | -       |
| 142      | 2          | NF          | F      | 74  | 1     | <2%   | no       | 0               | head           | 2 | 0 | 0 | 2a    | 3.5        | no         | no            | no                | no        | no         | DFS     | 110                            | 110                      | +     | -     | -       | -       |
| 143      | 2          | NF          | F      | 47  | 1     | <2%   | no       | 1               | head           | 3 | 1 | 0 | 3b    | 4.2        | yes        | yes           | no                | yes       | yes        | AWD     | 133                            | 21                       | +     | -     | -       | -       |
| 144      | 2          | NF          | F      | 47  | 2     |       |          | 6               | tail           | 2 | 0 | 1 | 4     | 2.5        | yes        | no            | yes               | yes       | yes        | DOD     | 126                            | 8                        | -     | -     | ++      | -       |
| 145      | 2          | NF          | F      | 38  | 1     | <2%   | no       | 0               | tail           | 3 | 0 | 0 | 2b    | 7.2        | no         | no            | no                | no        | no         | DFS     | 12                             | 12                       | -     | -     | ++      | -       |
| 146      | 2          | NF          | F      | 47  |       |       |          |                 | tail           | 3 | 0 | 0 | 2b    | 5          | no         | no            | no                | no        | no         | DFS     | 56                             | 56                       | +     | -     | ++      | -       |
| 147      | 2          | NF          | M      | 41  | 1     | <2%   | no       | 0               | body/tail      | 3 | 0 | 1 | 4     | 7          | yes        | no            | yes               | yes       | yes        | AWD     | 58                             | 28                       | +     | -     | -       | -       |
| 148      | 2          | NF          | M      | 74  | 2     |       |          | 3               | tail           | 2 | 0 | 0 | 2a    | 3.4        | no         | no            | no                | no        | no         | DFS     | 64                             | 64                       | -     | -     | -       | -       |

| Sample # | Collective | Tumor type  | Gender | Age | Grade | Ki-67 | Ki-67>2% | Mitosis /10 HPF | Location  | T | N | M | Stage | Tumor Size | Metastasis | LN metastasis | Distal metastasis | Malignant | Recurrence | Outcome | Duration of follow up (months) | Duration of DFS (months) | INX T | INX N | UCLH1 T | UCLH1 N |
|----------|------------|-------------|--------|-----|-------|-------|----------|-----------------|-----------|---|---|---|-------|------------|------------|---------------|-------------------|-----------|------------|---------|--------------------------------|--------------------------|-------|-------|---------|---------|
| 149      | 2          | Gastrinoma  | F      | 30  | 2     | <2%   | no       | 2               | head      | 3 | 1 | 0 | 3b    | 6.5        | yes        | yes           | no                | yes       | yes        | AWD     | 113                            | 14                       | +     |       | +       |         |
| 150      | 2          | Insulinoma  | M      | 75  | 1     | <2%   | no       | 0               | body      | 1 | 0 | 0 | 1     | 1.5        | no         | no            | no                | no        | no         | DFS     | 34                             | 34                       | +     |       | —       |         |
| 151      | 2          | NF          | F      | 71  | 1     | <2%   | no       | 1               | tail      | 3 | 0 | 0 | 2b    | 7.8        | no         | no            | no                | no        | no         | DFS     | 5                              | 5                        | +     |       | —       |         |
| 152      | 2          | Insulinoma  | F      | 58  | 2     |       |          | 12              | body      | 2 | 0 | 0 | 2a    | 4          | no         | no            | no                | no        | no         | DFS     | 4                              | 4                        | +     |       | ++      |         |
| 153      | 2          | NF          | M      | 66  | 1     | <2%   | no       | 1               | tail      | 3 | 1 | 0 | 3b    | 7.9        | yes        | yes           | no                | yes       | yes        | AWD     | 103                            | 96                       | —     |       | —       |         |
| 154      | 2          | NF          | M      | 60  | 2     |       |          | 6               | tail      | 3 | 0 | 0 | 2b    | 5.5        | no         | no            | no                | no        | no         | DFS     | 66                             | 66                       | —     |       | —       |         |
| 155      | 2          | Glucagonoma | M      | 47  | 2     |       |          | 2               | tail      | 2 | 0 | 0 | 2a    | 3.5        | no         | no            | no                | yes       | yes        | AWD     | 44                             | 14                       | —     |       | —       |         |
| 156      | 2          | NF          | M      | 44  |       |       |          |                 | body      | 3 | 1 | 0 | 3b    | 12         | yes        | yes           | no                | yes       | no         | DFS     | 81                             | 81                       | +     |       | +       |         |
| 157      | 2          | NF          | M      | 56  | 2     | 5%    |          | 14              | body/tail | 3 | 1 | 1 | 4     | 4.2        | yes        | yes           | yes               | yes       | yes        | DOD     | 37                             |                          | —     |       | —       |         |
| 158      | 2          | NF          | M      | 59  | 1     | <2%   | no       | 1               | tail      | 3 | 0 | 0 | 2b    | 4.3        | no         | no            | no                | no        | no         | DFS     | 25                             | 25                       | +     |       | —       |         |
| 159      | 2          | NF          | M      | 26  | 2     |       |          | 6               | tail      | 2 | 0 | 0 | 2a    | 3          | no         | no            | no                | no        | no         | DFS     | 34                             | 34                       | +     |       | —       |         |
| 160      | 2          | NF          | M      | 79  | 2     |       |          | 3               | head      | 2 | 0 | 0 | 2a    | 2.8        | no         | no            | no                | no        | no         | DFS     | 75                             | 75                       | +     |       | ++      |         |
| 161      | 2          | NF          | M      | 57  | 1     | <2%   | no       | 0               | head      | 1 | 0 | 0 | 1     | 1.4        | no         | no            | no                | no        | no         | DFS     | 54                             | 54                       | —     |       | —       |         |
| 162      | 2          | NF          | M      | 52  | 1     | <2%   | no       | 0               | body      | 1 | 0 | 0 | 1     | 1.1        | no         | no            | no                | no        | no         | DFS     | 28                             | 28                       | +     |       | —       |         |
| 163      | 2          | NF          | M      | 47  | 1     | <1%   | no       | 0               | body/tail | 1 | 0 | 0 | 1     | 1          | no         | no            | no                | no        | no         | DFS     | 36                             | 36                       | —     |       | —       |         |
| 164      | 2          | NF          | F      | 45  | 2     |       |          | 10              | head      | 3 | 1 | 0 | 3b    | 10.5       | yes        | yes           | no                | yes       | yes        | DOD     | 67                             | 6                        | —     |       | +       |         |
| 165      | 2          | NF          | M      | 70  | 2     |       |          | 7               | tail      | 3 | 0 | 0 | 2b    | 4.5        | no         | no            | no                | no        | no         | DFS     | 47                             | 47                       | —     |       | +       |         |
| 166      | 2          | NF          | M      | 48  | 1     | <2%   | no       | 0               | head      | 2 | 0 | 0 | 2a    | 2.5        | no         | no            | no                | no        | no         | DFS     | 8                              | 8                        | +     |       | —       |         |
| 167      | 2          | NF          | F      | 57  | 1     | <2%   | no       | 1               | body/tail | 2 | 0 | 0 | 2a    | 4          | no         | no            | no                | no        | no         | DFS     | 95                             | 95                       | +     |       | —       |         |
| 168      | 2          | NF          | M      | 52  | 2     |       |          | 3               | head      | 3 | 1 | 1 | 4     | 4.4        | yes        | yes           | yes               | yes       | yes        | DOD     | 90                             | 45                       | +     |       | +       |         |
| 169      | 2          | NF          | M      | 68  | 1     | <2%   | no       | 1               | body      | 2 | 0 | 0 | 2a    | 2.5        | no         | no            | no                | no        | no         | DFS     | 100                            | 1                        | —     |       | —       |         |
| 170      | 2          | NF          | F      | 55  | 1     | <2%   | no       | 0               | head      | 2 | 0 | 0 | 2a    | 2.5        | no         | no            | no                | no        | no         | DFS     | 34                             | 34                       | +     |       | +       |         |
| 171      | 2          | NF          | F      | 64  | 1     | <2%   | no       | 0               | head      | 3 | 0 | 0 | 2b    | 4.5        | no         | no            | no                | no        | no         | DFS     | 59                             | 59                       | —     |       | —       |         |
| 172      | 2          | NF          | F      | 40  | 1     | <2%   | no       | 0               | tail      | 3 | 0 | 0 | 2b    | 5.2        | no         | no            | no                | no        | no         | DFS     | 82                             | 82                       | —     |       | —       |         |
| 173      | 2          | NF          | F      | 68  | 1     | <2%   | no       | 1               | tail      | 2 | 0 | 0 | 2a    | 3          | no         | no            | no                | no        | no         | DUC     | 76                             | 76                       | —     |       | —       |         |
| 174      | 2          | Insulinoma  | M      | 53  | 2     |       |          | 6               | tail      | 2 | 0 | 0 | 2a    | 4.2        | no         | no            | no                | yes       | yes        | AWD     | 45                             | 14                       | +     |       | —       |         |
| 175      | 2          | NF          | F      | 37  | 2     | 5%    | yes      | 3               | head      | 3 | 1 | 1 | 4     | 7.5        | yes        | yes           | yes               | yes       | yes        | DOD     | 24                             | 2                        | —     |       | —       |         |
| 176      | 2          | NF          | M      | 59  | 1     | <2%   | no       | 0               | tail      | 2 | 0 | 0 | 2a    | 2.6        | no         | no            | no                | no        | no         | DFS     | 74                             | 74                       | +     |       | —       |         |
| 177      | 2          | NF          | M      | 55  | 2     |       |          | 2               | tail      | 3 | 1 | 0 | 3b    | 11         | yes        | yes           | no                | yes       | yes        | AWD     | 98                             | 15                       | —     |       | —       |         |
| 178      | 2          | NF          | F      | 43  | 2     | 5%    | yes      | 1               | head      | 3 | 0 | 0 | 2b    | 17         | no         | no            | no                | yes       | yes        | AWD     | 85                             | 34                       | +     |       | —       |         |
| 179      | 2          | NF          | F      | 68  | 2     | 3%    | yes      | 1               | head      | 2 | 1 | 0 | 3b    | 2          | yes        | yes           | no                | yes       | no         | DFS     | 85                             | 85                       | —     |       | —       |         |
| 180      | 2          | NF          | M      | 62  | 2     | 5%    | yes      | 12              | body/tail | 2 | 0 | 0 | 2a    | 3.1        | no         | no            | no                | no        | no         | DFS     | 37                             | 37                       | +     |       | +       |         |
| 181      | 2          | NF          | M      | 63  | 2     | 3%    | yes      | 5               | body/tail | 2 | 0 | 0 | 2a    | 4          | no         | no            | no                | no        | no         | DFS     | 20                             | 20                       | —     |       | —       |         |
| 182      | 2          | NF          | M      | 62  | 1     | <2%   | no       | 0               | tail      | 2 | 0 | 0 | 2a    | 3.6        | no         | no            | no                | no        | no         | DFS     | 49                             | 49                       | +     |       | —       |         |
| 183      | 2          | NF          | M      | 65  |       |       |          |                 | tail      | 3 | 1 | 0 | 3b    | 5          | yes        | yes           | no                | yes       | no         | DFS     | 42                             | 42                       | —     |       | —       |         |
| 184      | 2          | NF          | M      | 47  |       |       |          |                 | tail      | 3 | 0 | 1 | 4     | 14.5       | yes        | no            | yes               | yes       | yes        | AWD     | 31                             |                          | —     |       | —       |         |
| 185      | 2          | NF          | F      | 52  | 2     | 2%    | no       | 9               | tail      | 3 | 1 | 0 | 3b    | 6.2        | yes        | yes           | no                | yes       | yes        | AWD     | 74                             | 1                        | —     |       | +       |         |
| 186      | 2          | NF          | M      | 71  | 2     | >2%   | yes      | 1               | tail      | 3 | 1 | 0 | 3b    | 5.7        | yes        | yes           | no                | yes       | no         | DFS     | 72                             | 72                       | —     |       | +       |         |
| 187      | 2          | NF          | F      | 35  | 2     | <2%   | no       | 14              | head      | 3 | 1 | 1 | 4     | 4.5        | yes        | yes           | yes               | yes       | yes        | DOD     | 62                             |                          | +     |       | —       |         |
| 188      | 2          | NF          | F      | 47  |       |       |          |                 | body/tail | x | 0 | 1 | 4     |            | yes        | no            | yes               | yes       | yes        | DOD     | 218                            | 72                       | —     |       | —       |         |
| 189      | 2          | Insulinoma  | M      | 38  | 1     | <2%   | no       | 0               | body      | 1 | 0 | 0 | 1     | 1.3        | no         | no            | no                | no        | no         | DUC     | 11                             | 11                       | +     |       | +       |         |
| 190      | 2          | NF          | F      | 51  | 2     |       |          | 18              | body/tail | 3 | 0 | 1 | 4     | 15         | yes        | no            | yes               | yes       | yes        | DOD     | 96                             | 57                       | —     |       | +       |         |
| 191      | 2          | NF          | F      | 40  | 1     |       |          | 2               | head      | 3 | 1 | 1 | 4     | 4          | yes        | yes           | yes               | yes       | yes        | DOD     | 36                             |                          | —     |       | —       |         |
| 192      | 2          | Insulinoma  | F      | 52  | 1     | <2%   | no       | 1               | body/tail | 2 | 0 | 0 | 2a    | 4          | no         | no            | no                | no        | no         | DFS     | 24                             | 24                       | +     |       | —       |         |
| 193      | 2          | Gastrinoma  | F      | 65  | 1     | <2%   | no       | 0               | head      | 1 | 1 | 0 | 3b    | 1.2        | yes        | yes           | no                | yes       |            | DUC     | 4                              | 4                        | —     |       | —       |         |
| 194      | 2          | NF          | M      | 71  | 1     | <2%   | no       | 0               | body/tail | 1 | 0 | 0 | 1     | 1.8        | no         | no            | no                | no        | no         | DFS     | 131                            | 131                      | +     |       | —       |         |
| 195      | 2          | NF          | M      | 70  | 2     |       |          | 20              | body/tail | 3 | 0 | 0 | 2b    | 8          | no         | no            | no                | yes       | yes        | DOD     | 40                             | 18                       | —     |       | —       |         |
| 196      | 2          | NF          | M      | 61  | 2     |       |          | 12              | body/tail | 2 | 0 | 0 | 2a    | 3.4        | no         | no            | no                | no        | no         | DUC     | 15                             | 15                       | —     |       | —       |         |
| 197      | 2          | NF          | F      | 43  | 2     |       |          | 2               | tail      | 1 | 0 | 0 | 1     | 1.8        | no         | no            | no                | no        | no         | DFS     | 154                            | 154                      | —     |       | —       |         |
| 198      | 2          | NF          | F      | 71  | 2     |       |          | 2               | body/tail | 1 | 0 | 0 | 1     | 1.5        | no         | no            | no                | no        | no         | DFS     | 154                            | 154                      | —     |       | +       |         |

| Sample # | Collective | Tumor type  | Gender | Age | Grade | Ki-67 | Ki-67>2% | Mitosis /10 HPF | Location       | T | N | M | Stage | Tumor Size | Metastasis | LN metastasis | Distal metastasis | Malignant | Recurrence | Outcome | Duration of follow up (months) | Duration of DFS (months) | INX T | INX N | UCLH1 T | UCLH1 N |
|----------|------------|-------------|--------|-----|-------|-------|----------|-----------------|----------------|---|---|---|-------|------------|------------|---------------|-------------------|-----------|------------|---------|--------------------------------|--------------------------|-------|-------|---------|---------|
| 199      | 2          | NF          | F      | 50  | 1     | <2%   | no       | 1               | head           | 2 | 1 | 0 | 3b    | 2.5        | yes        | yes           | no                | yes       | no         | DFS     | 37                             | 37                       | —     |       | +       |         |
| 200      | 2          | NF          | F      | 70  | 1     | <2%   | no       | 1               | body/tail      | 3 | 0 | 0 | 2b    | 6.5        | no         | no            | no                | no        | no         | DUC     | 131                            | 131                      | —     |       | +       |         |
| 201      | 2          | VIPoma      | F      | 65  |       |       |          |                 | body/tail      | x | x | 1 | 4     |            | yes        | yes           | yes               | yes       | yes        | DOD     | 151                            | 35                       | —     |       | +       |         |
| 202      | 2          | NF          | M      | 46  | 1     | <2%   | no       | 0               | head           | 2 | 0 | 0 | 2a    | 2.2        | no         | no            | no                | no        | no         | DFS     | 99                             | 99                       | +     |       | +       |         |
| 203      | 2          | NF          | M      | 41  | 2     |       |          | 2               | body/tail      | 2 | 0 | 0 | 2a    | 3          | no         | no            | no                | no        | no         | DFS     | 56                             | 56                       | —     |       | —       |         |
| 204      | 2          | NF          | M      | 75  | 2     |       |          | 17              | body/tail      | 2 | 1 | 0 | 3b    | 3          | yes        | yes           | no                | yes       | yes        | DOD     | 39                             | 4                        | —     |       | —       |         |
| 205      | 2          | NF          | F      | 53  | 2     |       |          | 4               | tail           | 3 | 0 | 0 | 2b    | 15         | no         | no            | no                | no        | no         | DFS     | 136                            | 136                      | +     |       | +       |         |
| 206      | 2          | Insulinoma  | F      | 75  | 1     | <2%   | no       | 1               | tail           | 1 | 0 | 0 | 1     | 1          | no         | no            | no                | no        | no         | DFS     | 95                             | 95                       |       |       | +       |         |
| 207      | 2          | NF          | M      | 48  | 2     |       |          | 2               | head           | 3 | 0 | 0 | 2b    | 5.8        | no         | no            | no                | no        | no         | DFS     | 1                              | 1                        |       |       | —       |         |
| 208      | 2          | NF          | F      | 46  | 2     |       |          | 3               | tail           | 2 | 0 | 0 | 2a    | 3          | no         | no            | no                | no        | no         | DFS     | 117                            | 117                      | +     |       | —       |         |
| 209      | 2          | NF          | F      | 42  | 1     | <1%   | no       | 0               | tail           | 2 | 0 | 0 | 2a    | 2          | no         | no            | no                | no        | no         | DFS     | 119                            | 119                      |       |       | —       |         |
| 210      | 2          | NF          | M      | 70  | 2     | 4%    | yes      | 1               | tail           | 1 | 0 | 0 | 1     | 1.8        | no         | no            | no                | no        | no         | DFS     | 77                             | 77                       |       |       | —       |         |
| 211      | 2          | NF          | M      | 63  | 1     | <2%   | no       | 0               | tail           | 1 | 0 | 0 | 1     | 1.8        | no         | no            | no                | no        | no         | DFS     | 89                             | 89                       |       |       | —       |         |
| 212      | 2          | NF          | F      | 46  |       |       |          |                 | tail           | 3 | 0 | 0 | 2b    | 10         | no         | no            | no                | no        | no         | DFS     | 1                              | 1                        |       |       | —       |         |
| 213      | 2          | NF          | F      | 54  | 1     | <2%   | no       | 0               | tail           | 3 | 0 | 0 | 2b    | 8.5        | no         | no            | no                | no        | no         | DFS     | 7                              | 7                        |       |       | +       |         |
| 214      | 2          | NF          | F      | 54  | 2     |       |          | 3               | head           | 3 | 1 | 0 | 3b    | 8.4        | yes        | yes           | no                | yes       | yes        | DOD     | 35                             | 15                       | —     |       | +       |         |
| 215      | 2          | NF          | M      | 68  | 2     |       |          | 14              | head           | 2 | 0 | 0 | 2a    | 2.1        | no         | no            | no                | no        | no         | DUC     | 62                             | 62                       |       |       | —       |         |
| 216      | 2          | NF          | F      | 46  |       |       |          |                 | tail           | 3 | 1 | 1 | 4     | 7.5        | yes        | yes           | yes               | yes       |            |         |                                |                          |       |       | —       |         |
| 217      | 2          | NF          | M      | 47  |       |       |          |                 | head           | 3 | 0 | 0 | 2b    | 6          | no         | no            | no                | no        | no         | DFS     | 60                             | 60                       | +     |       | +       |         |
| 218      | 2          | Insulinoma  | M      | 58  | 1     | <1%   | no       | 0               | tail           | 3 | x | 1 | 4     | 7          | yes        |               | yes               | yes       |            |         |                                |                          | —     |       | +       | —       |
| 219      | 2          | Insulinoma  | F      | 27  | 2     | <1%   | no       | 4               | body/tail      | 1 | 0 | 0 | 1     | 1.8        | no         | no            | no                | no        |            |         |                                |                          | +     |       | +       | —       |
| 220      | 2          | Glucagonoma | F      | 63  | 1     | <1%   | no       | <1              | body           | 2 | 0 | 0 | 2a    | 2          | no         | no            | no                | no        | no         | DFS     | 190                            | 190                      | —     | —     | +       | —       |
| 221      | 2          | Insulinoma  | M      | 19  | 1     | <1%   | no       | 0               | head/body/tail | 2 | 0 | 0 | 2a    | 2          | no         | no            | no                | no        | no         | DFS     | 110                            | 110                      | +     | —     | +       | —       |
| 222      | 2          | NF          | M      | 34  | 1     | <1%   | no       |                 | head           | 3 | 0 | 0 | 2b    | 8          | no         | no            | no                | no        | no         | DFS     | 154                            | 154                      | —     |       | —       |         |
| 223      | 2          | NF          | F      | 61  | 1     | <1%   | no       | 0               | head           | 3 | 1 | 0 | 3b    | 8          | yes        | yes           | no                | yes       |            |         |                                |                          | —     |       | +       | —       |
| 224      | 2          | NF          | M      | 35  | 2     | 0     | no       | 6               |                | 3 | x | 1 | 4     | 8          | yes        |               | yes               | yes       |            | DOD     | 2                              |                          | —     |       | —       |         |
| 225      | 2          | NF          | M      | 54  | 1     | <1%   | no       | 0               | tail           | 3 | 0 | 0 | 2b    | 3          | no         | no            | no                | yes       |            | DOD     | 5                              |                          | —     |       | —       |         |
| 226      | 2          | NF          | M      | 62  | 1     | <1%   | no       | <2              | head           | 3 | x | 1 | 4     | 3          | yes        |               | yes               | yes       |            |         |                                |                          | —     |       | +       | —       |
| 227      | 2          | NF          | F      | 48  | 1     | <1%   | no       | 0               | body           | 2 | 0 | 0 | 2a    | 2          | no         | no            | no                | no        | no         | DOD     | 103                            | 63                       | —     | —     | +       | —       |
| 228      | 2          | NF          | F      | 23  | 1     | <1%   | no       |                 | head           | 2 | x | 1 | 4     | 4          | yes        |               | yes               | yes       |            |         |                                |                          | —     |       | —       |         |
| 229      | 2          | Insulinoma  | M      | 23  | 2     | <1%   | no       | 6               | head           | 1 | 0 | 0 | 1     | 1.5        | no         | no            | no                | no        |            |         |                                |                          | +     |       | +       |         |
| 230      | 2          | Insulinoma  | F      | 53  | 1     | <1%   | no       | 0               | head           | 1 | 0 | 0 | 1     | 1.5        | no         | no            | no                | no        | no         | DFS     | 104                            | 104                      | +     | —     | +       | —       |
| 231      | 2          | Insulinoma  | F      | 54  | 1     | <1%   | no       | 0.6             | head           | 2 | 0 | 0 | 2a    | 2          | no         | no            | no                | no        | no         | DFS     | 92                             | 92                       | +     | —     | +       | —       |
| 232      | 2          | Insulinoma  | F      | 51  | 1     | <1%   | no       | 0.4             | body/tail      | 2 | 0 | 0 | 2a    | 3          | no         | no            | no                | no        | no         | DFS     | 41                             | 41                       | —     |       | +       |         |
| 233      | 2          | Insulinoma  | M      | 56  | 1     | <1%   | no       |                 | tail           | 2 | 0 | 0 | 2a    | 3          | no         | no            | no                | no        | no         | DFS     | 87                             | 87                       | —     | —     | —       | —       |
| 234      | 2          | Insulinoma  | F      | 53  | 1     | 2%    | no       |                 | head           | 1 | 0 | 0 | 1     | 1.5        | no         | no            | no                | no        | no         | DFS     | 24                             | 24                       | —     | —     | +       |         |
| 235      | 2          | Insulinoma  | F      | 39  | 2     | 10%   | yes      | 7               | tail           | 2 | 0 | 0 | 2a    | 2.5        | no         | no            | no                | no        | no         | DFS     | 83                             | 83                       | +     | —     | +       | —       |
| 236      | 2          | Insulinoma  | M      | 59  | 2     | 5%    | yes      |                 | tail           | 2 | 0 | 0 | 2a    | 2          | no         | no            | no                | no        | no         | DFS     | 82                             | 82                       | +     | —     | +       | —       |
| 237      | 2          | Insulinoma  | F      | 62  | 1     | <1%   | no       | 1               | neck           | 1 | 0 | 0 | 1     | 1.5        | no         | no            | no                | no        | no         | DFS     | 22                             | 22                       | —     |       | +       |         |
| 238      | 2          | Insulinoma  | M      | 57  | 2     | <1%   | no       | 3               | tail           | 2 | 0 | 0 | 2a    | 2          | no         | no            | no                | no        | no         | DFS     | 81                             | 81                       | —     |       | +       | —       |
| 239      | 2          | Insulinoma  | F      | 46  | 1     | <1%   | no       | 0               | body/tail      | 1 | 0 | 0 | 1     | 1.5        | no         | no            | no                | no        | no         | DFS     | 80                             | 80                       | —     | —     | +       | —       |
| 240      | 2          | Insulinoma  | M      | 30  | 1     | <1%   | no       |                 | neck           | 2 | 0 | 0 | 2a    | 2          | no         | no            | no                | no        | no         | DFS     | 69                             | 69                       | +     |       | +       |         |
| 241      | 2          | Insulinoma  | F      | 30  | 1     | <1%   | no       | <2              | tail           | 1 | 0 | 0 | 1     | 1.5        | no         | no            | no                | no        | no         | DFS     | 57                             | 57                       | +     | —     | +       | —       |
| 242      | 2          | NF          | F      | 57  | 3     | >20%  | yes      |                 | body           | 4 | 1 | 1 | 4     | 4          | yes        | yes           | yes               | yes       | no         | DOD     | 37                             | 15                       | —     | —     | +       | —       |
| 243      | 2          | NF          | M      | 56  | 1     | 2%    | no       |                 | body/tail      | 4 | 0 | 1 | 4     | 12         | no         | no            | yes               | yes       | no         | DFS     | 65                             | 65                       | +     | —     | —       | —       |
| 244      | 2          | NF          | F      | 39  | 1     | 1%    | no       |                 | head           | 3 | 0 | 0 | 2b    | 9          | no         | no            | no                | no        | no         | DFS     | 60                             | 60                       | +     |       | +       |         |
| 245      | 2          | NF          | F      | 40  | 2     | 3%    | yes      |                 | head           | 3 | 1 | 0 | 3b    | 4          | yes        | yes           | no                | yes       | yes        | DOD     | 16                             | 11                       | —     |       | +       |         |
| 246      | 2          | NF          | F      | 68  | 3     | 60%   | yes      |                 | head/neck      | 2 | 0 | 0 | 2a    | 2          | no         | no            | no                | yes       | yes        | DOD     | 26                             | 1                        | —     |       | —       |         |
| 247      | 2          | NF          | M      | 39  | 2     | 5%    | yes      |                 | head           | 3 | 0 | 0 | 2b    | 7          | no         | no            | no                | yes       | no         | DFS     | 56                             | 56                       | +     |       | —       |         |
| 248      | 2          | NF          | M      | 59  | 3     | 30%   | yes      | 20              | body/tail      | 4 | x | 1 | 4     | 5          | yes        |               | yes               | yes       | yes        | DOD     | 19                             |                          | +     | —     | —       | —       |

| Sample # | Collective | Tumor type  | Gender | Age | Grade | Ki-67 | Ki-67>2% | Mitosis /10 HPF | Location           | T | N | M | Stage | Tumor Size | Metastasis | LN metastasis | Distal metastasis | Malignant | Recurrence | Outcome | Duration of follow up (months) | Duration of DFS (months) | INX T | INX N | UCL1 T | UCL1 N |
|----------|------------|-------------|--------|-----|-------|-------|----------|-----------------|--------------------|---|---|---|-------|------------|------------|---------------|-------------------|-----------|------------|---------|--------------------------------|--------------------------|-------|-------|--------|--------|
| 249      | 2          | NF          | M      | 32  | 3     | 30%   | yes      | 2               | head               | 4 | 0 | 0 | 3a    | 6          | no         | no            | no                | yes       | yes        | DOD     | 33                             | 12                       | —     | —     | —      | —      |
| 250      | 1          | Insulinoma  | F      | 46  |       |       |          |                 | body/tail          | 1 | 0 | 0 | 1     | 1          | no         | no            | no                | no        |            |         |                                |                          | +     | —     | +      | —      |
| 251      | 1          | Insulinoma  | F      | 43  |       |       |          |                 |                    | 1 | 0 | 0 |       |            | no         | no            | no                | no        |            |         |                                |                          |       | —     | —      | —      |
| 252      | 1          | Insulinoma  | M      | 22  |       | < 2%  | no       |                 | body/tail          | 1 | 0 | 0 | 1     | 1          | no         | no            | no                | no        |            |         |                                |                          | +     | —     | +      | —      |
| 253      | 1          | Insulinoma  | F      | 56  | 1     | 1%    | no       |                 | body/tail          | 2 | 0 | 0 | 2a    | 2          | no         | no            | no                | no        | no         | DFS     | 88                             | 88                       | +     | —     | —      | —      |
| 254      | 1          | Insulinoma  | M      | 54  | 2     | > 2%  | yes      |                 | head/neck          | 2 | 0 | 0 | 2a    | 2.5        | no         | no            | no                | no        | no         | DFS     | 118                            | 118                      | +     | —     | +      | —      |
| 255      | 1          | Insulinoma  | F      | 74  | 1     | 1%    | no       | 0.2             | body/tail          | 2 | 0 | 0 | 2a    | 3          | no         | no            | no                | no        | no         | DFS     | 79                             | 79                       | +     | —     | —      | —      |
| 256      | 1          | Insulinoma  | F      | 69  | 2     | 20%   | yes      | 3               | body/tail          | 1 | 0 | 0 | 1     | 1.5        | no         | no            | no                | no        | no         | DFS     | 35                             | 35                       | +     | —     | —      | —      |
| 257      | 1          | Insulinoma  | F      | 18  | 2     | > 2%  | yes      | 0.7             | body/tail          | 1 | 0 | 0 | 1     | 0.7        | no         | no            | no                | no        | no         | DFS     | 42                             | 42                       | —     | —     | +      | —      |
| 258      | 1          | Insulinoma  | M      | 16  | 2     | 10%   | yes      |                 | body/tail          | 1 | 0 | 0 | 1     | 1.5        | no         | no            | no                | no        | no         | DFS     | 30                             | 30                       | +     | —     | —      | —      |
| 259      | 1          | Insulinoma  | F      | 57  | 1     | < 1%  | no       | 1               | body/tail          | 1 | 0 | 0 | 1     | 1          | no         | no            | no                | no        |            |         |                                |                          | +     | —     | +      | —      |
| 260      | 1          | Insulinoma  | F      | 36  | 1     | 0.10% | no       | 0.5             | head/neck          | 2 | 0 | 0 | 2a    | 2          | no         | no            | no                | no        |            |         |                                |                          | +     | —     | —      | —      |
| 261      | 1          | Insulinoma  | M      | 52  | 1     | < 1%  | no       | 1               | body/tail          | 1 | 0 | 0 | 1     | 1.2        | no         | no            | no                | no        | no         | DFS     | 57                             | 57                       | +     | —     | —      | —      |
| 262      | 1          | Insulinoma  | F      | 58  |       | 1%    | no       |                 | body/tail          | 2 | 0 | 0 | 2a    | 2          | no         | no            | no                | no        |            |         |                                |                          |       | —     | —      | —      |
| 263      | 1          | Insulinoma  | M      | 42  | 2     | 2%    | yes      |                 | head/neck          | 1 | 0 | 0 | 1     | 1.5        | no         | no            | no                | no        | no         | DFS     | 72                             | 72                       | +     | —     | —      | —      |
| 264      | 1          | Insulinoma  | F      | 68  |       |       |          | 1               | body/tail          | 2 | 0 | 0 | 2a    | 2.7        | no         | no            | no                | no        | no         | DFS     | 62                             | 62                       | +     | —     | —      | —      |
| 265      | 1          | Insulinoma  | F      | 66  |       | 1%    | no       |                 | body/tail          | 2 | 0 | 0 | 2a    | 2          | no         | no            | no                | no        |            |         |                                |                          |       | —     | —      | —      |
| 266      | 1          | Insulinoma  | M      | 47  | 1     | < 2%  | no       | 0.3             | head/neck          | 1 | 0 | 0 | 1     | 1          | no         | no            | no                | no        | no         | DFS     | 17                             | 17                       | +     | —     | —      | —      |
| 267      | 1          | Insulinoma  | F      | 34  |       |       |          |                 | body/tail          | 1 | 0 | 0 | 1     | 0.8        | no         | no            | no                | no        |            |         |                                |                          |       | —     | —      | —      |
| 268      | 1          | Insulinoma  | F      | 19  | 2     | 2%    | no       | 3               | head/neck          | 1 | 0 | 0 | 1     | 1.2        | no         | no            | no                | no        | no         | DFS     | 13                             | 13                       | +     | —     | —      | —      |
| 269      | 1          | Insulinoma  | F      | 32  | 1     | 0.10% | no       | 1               | head/neck          | 2 | 0 | 0 | 2a    | 2          | no         | no            | no                | no        | no         | DFS     | 8                              | 8                        | +     | —     | —      | —      |
| 270      | 1          | Insulinoma  | M      | 40  |       |       |          |                 | head/neck          | 1 | 0 | 0 | 1     | 1.2        | no         | no            | no                | no        |            |         |                                |                          |       | +     | —      | —      |
| 271      | 1          | Insulinoma  | F      | 40  |       | <1%   | no       |                 | head/neck          | 1 | 0 | 0 | 1     | 1.6        | no         | no            | no                | no        |            |         |                                |                          | +     | —     | —      | —      |
| 272      | 2          | Glucagonoma | M      | 70  | 2     | 5%    | yes      |                 | body/tail          | 3 | 1 | 0 | 3b    | 8          | yes        | yes           | yes               | yes       | yes        | AWD     | 53                             |                          | —     | —     | —      | —      |
| 273      | 2          | Gastrinoma  | M      | 47  | 1     | 2%    | no       |                 | head               | 2 | 0 | 0 | 2a    | 2.5        | no         | no            | no                | no        | no         | DFS     | 90                             | 90                       | —     | —     | —      | —      |
| 274      | 2          | Glucagonoma | F      | 54  | 3     | 45%   | yes      |                 | head               | 3 | 1 | 1 | 4     | 4.2        | yes        | yes           | yes               | yes       |            | AWD     | 2                              |                          | +     | —     | —      | —      |
| 275      | 2          | Insulinoma  | F      | 54  | 2     | < 1%  | no       | 4               | body/tail          | 3 | 1 | 1 | 4     | 4.8        | yes        | yes           | yes               | yes       | yes        | DOD     | 19                             | 12                       | —     | —     | —      | —      |
| 276      | 1          | Insulinoma  | F      | 44  | 1     | < 2%  | no       |                 | body/tail          | 1 | 0 | 0 | 1     | 1.2        | no         | no            | no                | no        | no         | DFS     | 96                             | 96                       | —     | —     | —      | —      |
| 277      | 1          | Insulinoma  | F      | 32  | 2     | 0.10% | no       | 3               | body/tail          | 1 | 0 | 0 | 1     | 1.5        | no         | no            | no                | no        | no         | DFS     | 142                            | 142                      | +     | —     | +      | —      |
| 278      | 1          | Insulinoma  | M      | 51  | 1     | < 2%  | no       | 0.5             | body/tail          | 2 | 0 | 1 | 4     | 4          | yes        | no            | yes               | yes       | yes        | DOD     | 59                             |                          | —     | —     | —      | —      |
| 279      | 1          | Insulinoma  |        |     |       |       |          |                 | liver (metastasis) |   |   |   |       | 1.6        |            |               |                   |           |            |         |                                |                          | —     | —     | —      | —      |
| 280      | 1          | Insulinoma  | F      | 56  | 1     | 0.10% | no       | 1               | Tail               | 1 | 0 | 0 | 1     | 1.8        | no         | no            | no                | no        | no         | DFS     | 143                            | 143                      | —     | —     | +      | —      |
| 281      | 1          | Insulinoma  | F      | 36  | 1     |       |          | 0               | head               | 2 | 0 | 0 | 2a    | 2          | no         | no            | no                | no        | no         | DFS     | 136                            | 136                      | +     | —     | +      | —      |
| 282      | 1          | Insulinoma  | F      | 41  | 2     | <0.1% | no       | 2               | head               | 1 | 0 | 0 | 1     | 1.2        | no         | no            | no                | no        | no         | DFS     | 125                            | 125                      | +     | —     | —      | —      |
| 283      | 1          | Insulinoma  | M      | 51  | 1     | < 2%  | no       | 1               | head               | 2 | 0 | 0 | 2a    | 2          | no         | no            | no                | yes       | yes        | AWD     | 36                             |                          | —     | —     | —      | —      |
| 284      | 1          | Insulinoma  | F      | 23  | 1     | 0.20% | no       | 0               | head               | 1 | 0 | 0 | 1     | 1.5        | no         | no            | no                | no        | no         | DFS     | 80                             | 80                       | +     | —     | +      | —      |
| 285      | 1          | Insulinoma  | M      | 44  | 1     | < 2%  | no       |                 | head               | 1 | 0 | 0 | 1     | 1          | no         | no            | no                | no        | no         | DFS     | 77                             | 77                       | +     | —     | +      | —      |
| 286      | 1          | Insulinoma  | F      | 37  | 1     | 1%    | no       | 1               | Tail               | 1 | 0 | 0 | 1     | 0.8        | no         | no            | no                | no        | no         | DFS     | 112                            | 112                      | +     | —     | —      | —      |
| 287      | 2          | NF          | M      | 31  | 2     | 1%    | no       | 7               | head               | 4 | 1 | 1 | 4     | 1.7        | yes        | yes           | yes               | yes       | no         | DOD     | 9                              | 6                        | —     | —     | +      | —      |
| 288      | 2          | NF          |        |     |       |       |          |                 | scalp (metastasis) |   |   |   |       |            |            |               |                   |           |            |         |                                |                          | —     | —     | +      | —      |
| 289      | 1          | NF          | F      | 22  | 1     | < 1%  | no       |                 | body/tail          | 2 | 0 | 0 | 2a    | 4          | no         | no            | no                | no        | no         | DFS     | 36                             | 36                       | +     | —     | +      | —      |
| 290      | 1          | Insulinoma  | F      | 40  | 1     | 2%    | no       | < 2             | head               | 1 | 0 | 0 | 1     | 1.5        | no         | no            | no                | no        |            |         |                                |                          | +     | —     | +      | —      |
| 291      | 1          | Insulinoma  | F      | 64  | 2     | 3%    | yes      |                 | body/tail          | 2 | 0 | 0 | 2a    | 2          | no         | no            | no                | no        | no         | DFS     | 125                            | 125                      | +     | —     | —      | —      |
| 292      | 1          | Insulinoma  | F      | 46  |       |       |          |                 | Tail               | 1 | 0 | 0 | 1     | 1.2        | no         | no            | no                | no        |            |         |                                |                          | +     | —     | —      | —      |
| 293      | 2          | NF          | F      | 46  | 2     | 3%    | yes      |                 | head               | 2 | 1 | 0 | 3b    | 3.5        | yes        | yes           | no                | yes       | yes        | DOD     | 23                             | 12                       | —     | —     | +      | —      |
| 294      | 2          | NF          |        |     |       |       |          |                 | lymph (metastasis) |   |   |   |       |            |            |               |                   |           |            |         |                                |                          | —     | —     | —      | —      |
| 295      | 1          | Insulinoma  | M      | 32  | 2     | 5%    | yes      |                 |                    | 2 | 0 | 0 | 2a    | 2          | no         | no            | no                | no        | no         | DFS     | 42                             | 42                       | —     | —     | —      | —      |
| 296      | 1          | Insulinoma  | M      | 43  | 1     | 0     | no       |                 | head               | 1 | 0 | 0 | 1     | 1.5        | no         | no            | no                | no        |            |         |                                |                          | +     | —     | —      | —      |
| 297      | 2          | NF          | F      | 61  | 1     | 2%    | no       |                 | neck               | 3 | 0 | 0 | 2b    | 7          | no         | no            | no                | yes       | yes        | AWD     | 59                             | 33                       | —     | —     | —      | —      |
| 298      | 2          | NF          | F      | 79  | 2     | 3%    | yes      |                 | body/tail          | 3 | 0 | 0 | 2b    | 5.5        | no         | no            | no                | yes       | yes        | AWD     | 85                             | 49                       | +     | —     | —      | —      |

| Sample # | Collective | Tumor type  | Gender | Age | Grade | Ki-67 | Ki-67>2% | Mitosis /10 HPF | Location       | T | N | M | Stage | Tumor Size | Metastasis | LN metastasis | Distal metastasis | Malignant | Recurrence | Outcome | Duration of follow up (months) | Duration of DFS (months) | INX T | INX N | UCL1 T | UCL1 N |
|----------|------------|-------------|--------|-----|-------|-------|----------|-----------------|----------------|---|---|---|-------|------------|------------|---------------|-------------------|-----------|------------|---------|--------------------------------|--------------------------|-------|-------|--------|--------|
| 299      | 2          | NF          | F      | 52  | 2     | 10%   | yes      | 3               | body/tail      | 2 | 1 | 0 | 3b    | 3.5        | yes        | yes           | no                | yes       | yes        | AWD     | 69                             | 63                       | +     |       | +      |        |
| 300      | 2          | NF          | M      | 49  | 2     | 5%    | yes      |                 | body/tail      | 2 | 1 | 0 | 3b    | 3.3        | yes        | yes           | no                | yes       | yes        | AWD     | 58                             | 24                       | +     |       | -      |        |
| 301      | 2          | NF          | M      | 61  | 2     | 10%   | yes      |                 | body/tail      | 3 | 0 | 1 | 4     | 8          | yes        | no            | yes               | yes       | yes        |         |                                |                          | +     |       | +      |        |
| 302      | 2          | NF          | F      | 46  | 2     | 15%   | yes      | 11              | tail           | 3 | 0 | 1 | 4     | 4.5        | yes        | no            | yes               | yes       | yes        |         |                                |                          | -     | -     | +      | -      |
| 303      | 2          | NF          | M      | 60  | 3     | 60%   | yes      | > 20            | tail           | 4 | 0 | 0 | 3a    | 9          | no         | no            | no                | yes       | yes        | DFS     | 17                             | 10                       | +     | -     | -      |        |
| 304      | 2          | NF          | M      | 55  | 2     | 20%   | yes      | 10              | tail           | 2 | 0 | 0 | 2a    | 2.5        | no         | no            | no                | no        | no         | DFS     | 38                             | 38                       | -     | -     | -      | -      |
| 305      | 1          | Insulinoma  | F      | 43  | 1     | 1%    | no       | < 2             | head/neck      | 1 | 0 | 0 | 1     | 1          | no         | no            | no                | no        | no         | DFS     | 2                              | 2                        | -     | -     | -      | -      |
| 306      | 1          | Insulinoma  | M      | 61  | 1     | 1%    | no       | 0               | body/tail      | 2 | 0 | 0 | 2a    | 2          | no         | no            | no                | no        | no         | DFS     | 183                            | 183                      | -     | -     | -      | -      |
| 307      | 1          | Glucagonoma | M      | 34  | 1     | 0     | no       |                 | head/body/tail | 2 | 0 | 0 | 2a    | 3.9        | no         | no            | no                | no        | no         |         |                                |                          | +     | -     | +      | -      |
| 308      | 1          | Insulinoma  | F      | 44  | 2     | 4%    | yes      |                 | head/neck      | 1 | 0 | 0 | 1     | 1.5        | no         | no            | no                | no        | no         | DFS     | 34                             | 34                       | +     |       | -      |        |
| 309      | 1          | Insulinoma  | M      | 67  | 1     | 1.6%  | no       | < 2             | head           | 1 | 0 | 0 | 1     | 1.1        | no         | no            | no                | no        | no         | DUC     | 36                             |                          | -     | -     | -      |        |
| 310      | 1          | Insulinoma  | M      | 66  | 1     | 1%    | no       | < 2             | head/neck      | 1 | 0 | 0 | 1     | 1          | no         | no            | no                | no        | no         |         |                                |                          | +     | -     | +      | -      |
| 311      | 1          | Insulinoma  | F      | 29  | 1     | 1.5%  | no       | < 2             | head/neck      | 2 | 0 | 0 | 2a    | 2          | no         | no            | no                | no        | no         |         |                                |                          | +     | -     | -      | -      |
| 312      | 1          | Insulinoma  | M      | 67  |       |       |          |                 | tail           | 1 | 0 | 0 | 1     | 1.5        | no         | no            | no                | no        | no         | DFS     | 50                             | 50                       | +     |       | -      |        |
| 313      | 1          | Insulinoma  | F      | 58  | 1     | 1%    | no       | < 2             | head/neck      | 1 | 0 | 0 | 1     | 1.5        | no         | no            | no                | no        | no         |         |                                |                          | -     | -     | -      | -      |
| 314      | 1          | Insulinoma  | M      | 37  | 1     | 1.5%  | no       | < 2             | body/tail      | 2 | 0 | 0 | 2a    | 3          | no         | no            | no                | no        | no         |         |                                |                          | -     |       | -      |        |

## Supplementary Table S3 Signal pathways

| Ingenuity Canonical Pathways                         | -log(p-value) | Ratio | Downregulated | No change  | Upregulated  | No overlap with dataset | Molecules                                                                                                          |
|------------------------------------------------------|---------------|-------|---------------|------------|--------------|-------------------------|--------------------------------------------------------------------------------------------------------------------|
| G Beta Gamma Signaling                               | 8.21          | 0.10  | 0/121 (0%)    | 0/121 (0%) | 12/121 (10%) | 109/121 (90%)           | PRKACB,GNAS,PRKAR2B,MAPK1,GRB2,MAPK3,GNAO1,GNAI1,PRKACA,GNAQ,HRAS,GNAZ                                             |
| L-1 Signaling                                        | 6.97          | 0.10  | 0/109 (0%)    | 0/109 (0%) | 11/109 (10%) | 98/109 (90%)            | PRKACB,ECSIT,GNAS,MAPK14,PRKAR2B,MAPK1,GNAO1,GNAI1,PRKACA,GNAQ,GNAS                                                |
| Acute Phase Response Signaling                       | 6.73          | 0.08  | 0/181 (0%)    | 0/181 (0%) | 14/181 (8%)  | 167/181 (92%)           | ECSIT,HPX,FN1,APOH,MAPK1,GRB2,AHSG,SERPINF1,HRAS,PLG,MAPK14,ITIH2,C4BPA,MAPK3                                      |
| GNRH Signaling                                       | 6.35          | 0.08  | 1/153 (1%)    | 0/153 (0%) | 11/153 (7%)  | 141/153 (92%)           | PRKACB,GNAS,MAPK14,PRKAR2B,MAPK1,GRB2,MAPK3,GNAI1,PRKACA,GNAQ,PLCB3,HRAS                                           |
| Melatonin Signaling                                  | 6.11          | 0.11  | 1/81 (1%)     | 0/81 (0%)  | 8/81 (10%)   | 72/81 (89%)             | PRKACB,PRKAR2B,MAPK1,MAPK3,GNAO1,GNAI1,PRKACA,GNAQ,PLCB3                                                           |
| Cardiac Hypertrophy Signaling                        | 5.98          | 0.06  | 2/249 (1%)    | 0/249 (0%) | 13/249 (5%)  | 234/249 (94%)           | PRKACB,GNAS,MAPK1,GRB2,GNAQ,GNAI1,HRAS,GNAS,MAPK14,PRKAR2B,MAPK3,GNAO1,EIF2B5,PRKACA,PLCB3                         |
| CREB Signaling in Neurons                            | 5.75          | 0.06  | 1/207 (0%)    | 0/207 (0%) | 12/207 (6%)  | 194/207 (94%)           | PRKACB,GNAS,MAPK1,GRB2,GNAI1,GNAQ,HRAS,GNAS,PRKAR2B,MAPK3,GNAO1,PRKACA,PLCB3                                       |
| Parkinson's Signaling                                | 5.62          | 0.26  | 0/19 (0%)     | 0/19 (0%)  | 5/19 (26%)   | 14/19 (74%)             | UCHL1,SEPT5,MAPK14,MAPK1,CYCS                                                                                      |
| Gap Junction Signaling                               | 5.51          | 0.07  | 1/181 (1%)    | 0/181 (0%) | 11/181 (6%)  | 169/181 (93%)           | PRKACB,DBN1,GNAS,PRKAR2B,MAPK1,GRB2,MAPK3,GNAI1,PRKACA,GNAQ,PLCB3,HRAS                                             |
| AMPK Signaling                                       | 5.37          | 0.06  | 1/180 (1%)    | 0/180 (0%) | 10/180 (6%)  | 169/180 (94%)           | PRKACB,GNAS,MAPK14,PRKAR2B,MAPK1,PRKACA,PPM1A,CFTR,PFKP,PKFB2,PKFM                                                 |
| Renin-Angiotensin Signaling                          | 5.36          | 0.08  | 0/126 (0%)    | 0/126 (0%) | 10/126 (8%)  | 116/126 (92%)           | PRKACB,GNAS,MAPK14,PRKAR2B,MAPK1,GRB2,MAPK3,PRKACA,GNAQ,HRAS                                                       |
| β-Adrenergic Signaling                               | 5.27          | 0.08  | 0/109 (0%)    | 0/109 (0%) | 9/109 (8%)   | 100/109 (92%)           | PRKACB,GNAS,PRKAR2B,MAPK1,MAPK3,GNAI1,PRKACA,GNAQ,HRAS                                                             |
| Androgen Signaling                                   | 5.26          | 0.07  | 0/145 (0%)    | 0/145 (0%) | 10/145 (7%)  | 135/145 (93%)           | PRKACB,GNAS,PRKAR2B,MAPK1,MAPK3,GNAO1,GNAI1,PRKACA,GNAQ,GNAS                                                       |
| Corticotropin Releasing Hormone Signaling            | 5.22          | 0.07  | 0/145 (0%)    | 0/145 (0%) | 10/145 (7%)  | 135/145 (93%)           | PRKACB,GNAS,MAPK14,PRKAR2B,MAPK1,MAPK3,GNAO1,GNAI1,PRKACA,GNAQ                                                     |
| UDP-N-acetyl-D-galactosamine Biosynthesis II         | 5.06          | 0.16  | 1/25 (4%)     | 0/25 (0%)  | 3/25 (12%)   | 21/25 (84%)             | HK1,GPI,GNPDA2,UAP1                                                                                                |
| Ephrin Receptor Signaling                            | 5.00          | 0.06  | 0/210 (0%)    | 0/210 (0%) | 12/210 (6%)  | 198/210 (94%)           | ACTR2,GNAS,ARPC1A,MAPK1,GRB2,MAPK3,GNAO1,GNAI1,GNAQ,HRAS,GNAS,RASA1                                                |
| P2Y Purigenic Receptor Signaling Pathway             | 4.93          | 0.07  | 1/144 (1%)    | 0/144 (0%) | 9/144 (6%)   | 134/144 (93%)           | PRKACB,GNAS,PRKAR2B,MAPK1,MAPK3,GNAI1,PRKACA,GNAQ,PLCB3,HRAS                                                       |
| Ephrin B Signaling                                   | 4.92          | 0.10  | 0/82 (0%)     | 0/82 (0%)  | 8/82 (10%)   | 74/82 (90%)             | GNAS,MAPK1,MAPK3,GNAO1,GNAI1,GNAQ,HRAS,GNAS                                                                        |
| Leptin Signaling in Obesity                          | 4.88          | 0.09  | 1/85 (1%)     | 0/85 (0%)  | 7/85 (8%)    | 77/85 (91%)             | PRKACB,GNAS,PRKAR2B,MAPK1,GRB2,MAPK3,PRKACA,PLCB3                                                                  |
| BMP signaling pathway                                | 4.88          | 0.09  | 0/85 (0%)     | 0/85 (0%)  | 8/85 (9%)    | 77/85 (91%)             | PRKACB,MAPK14,PRKAR2B,MAPK1,GRB2,MAPK3,PRKACA,HRAS                                                                 |
| Role of NFAT in Cardiac Hypertrophy                  | 4.82          | 0.06  | 1/209 (0%)    | 0/209 (0%) | 11/209 (5%)  | 197/209 (94%)           | PRKACB,GNAS,MAPK14,PRKAR2B,MAPK1,GRB2,MAPK3,GNAI1,PRKACA,GNAQ,PLCB3,HRAS                                           |
| Actin Cytoskeleton Signaling                         | 4.80          | 0.05  | 2/242 (1%)    | 0/242 (0%) | 11/242 (5%)  | 229/242 (95%)           | KNG1,MYH10,ACTR2,FN1,MAPK1,GRB2,HRAS,GSN,IQGAP2,DIAPH1,ARPC1A,MAPK3,PFN2                                           |
| Axonal Guidance Signaling                            | 4.74          | 0.04  | 1/483 (0%)    | 0/483 (0%) | 18/483 (4%)  | 464/483 (96%)           | DPYSL2,PRKACB,ACTR2,GNAS,MAPK1,GRB2,GNAQ,GNAI1,HRAS,GNAS,PRKAR2B,ARPC1A,MAPK3,GNAO1,PRKACA,PLCB3,PFN2,PSMD14,RASA1 |
| Neuroprotective Role of THOP1 in Alzheimer's Disease | 4.64          | 0.11  | 0/55 (0%)     | 0/55 (0%)  | 6/55 (11%)   | 49/55 (89%)             | PRKACB,KNG1,PLG,PRKAR2B,HLA-A,PRKACA                                                                               |
| Relaxin Signaling                                    | 4.49          | 0.06  | 0/164 (0%)    | 0/164 (0%) | 10/164 (6%)  | 154/164 (94%)           | PRKACB,GNAS,PRKAR2B,MAPK1,MAPK3,GNAO1,GNAI1,PRKACA,GNAQ,GNAS                                                       |
| Melanocyte Development and Pigmentation Signaling    | 4.44          | 0.08  | 0/95 (0%)     | 0/95 (0%)  | 8/95 (8%)    | 87/95 (92%)             | PRKACB,GNAS,PRKAR2B,MAPK1,GRB2,MAPK3,PRKACA,HRAS                                                                   |
| Molecular Mechanisms of Cancer                       | 4.37          | 0.04  | 1/387 (0%)    | 0/387 (0%) | 15/387 (4%)  | 371/387 (96%)           | PRKACB,GNAS,MAPK1,GRB2,GNAQ,GNAI1,HRAS,GNAS,MAPK14,PRKAR2B,MAPK3,GNAO1,PRKACA,PLCB3,CYCS,RASA1                     |
| Endothelin-1 Signaling                               | 4.37          | 0.06  | 1/191 (1%)    | 0/191 (0%) | 10/191 (5%)  | 180/191 (94%)           | GNAS,MAPK14,MAPK1,GRB2,MAPK3,GNAO1,GNAI1,GNAQ,PLCB3,HRAS,GNAS                                                      |
| Chemokine Signaling                                  | 4.19          | 0.09  | 1/75 (1%)     | 0/75 (0%)  | 6/75 (8%)    | 68/75 (91%)             | MAPK14,MAPK1,MAPK3,GNAI1,GNAQ,PLCB3,HRAS                                                                           |
| NRF2-mediated Oxidative Stress Response              | 4.17          | 0.06  | 3/195 (2%)    | 0/195 (0%) | 8/195 (4%)   | 184/195 (94%)           | MGST1,MAPK14,MAPK1,MAPK3,DNAJA4,GCLC,HRAS,AOX1,DNAJB6,DNAJA1,TXNRD1                                                |
| IGF-1 Signaling                                      | 4.07          | 0.07  | 0/107 (0%)    | 0/107 (0%) | 8/107 (7%)   | 99/107 (93%)            | PRKACB,PRKAR2B,MAPK1,GRB2,MAPK3,PRKACA,HRAS,RASA1                                                                  |
| Amyloid Processing                                   | 4.03          | 0.10  | 0/61 (0%)     | 0/61 (0%)  | 6/61 (10%)   | 55/61 (90%)             | PRKACB,MAPK14,PRKAR2B,MAPK1,MAPK3,PRKACA                                                                           |
| Systemic Lupus Erythematosus Signaling               | 3.96          | 0.05  | 0/256 (0%)    | 0/256 (0%) | 12/256 (5%)  | 244/256 (95%)           | KNG1,PRPF19,LSM12,SNRBP,MAPK1,GRB2,HLA-A,MAPK3,HRAS,C8B,C8G,SNRNP40                                                |
| G-Protein Coupled Receptor Signaling                 | 3.96          | 0.05  | 1/276 (0%)    | 0/276 (0%) | 12/276 (4%)  | 263/276 (95%)           | PRKACB,PRKAR2B,GNAS,MAPK1,GRB2,MAPK3,GNAO1,PRKACA,GNAQ,GNAI1,PLCB3,HRAS,RASA1                                      |
| Thrombin Signaling                                   | 3.94          | 0.05  | 1/211 (0%)    | 0/211 (0%) | 10/211 (5%)  | 200/211 (95%)           | GNAS,MAPK14,MAPK1,GRB2,MAPK3,GNAO1,GNAI1,GNAQ,PLCB3,HRAS,GNAS                                                      |
| Breast Cancer Regulation by Stathmin1                | 3.90          | 0.05  | 1/214 (0%)    | 0/214 (0%) | 10/214 (5%)  | 203/214 (95%)           | PRKACB,GNAS,PRKAR2B,MAPK1,GRB2,MAPK3,GNAI1,PRKACA,GNAQ,PLCB3,HRAS                                                  |
| EGF Signaling                                        | 3.80          | 0.09  | 0/64 (0%)     | 0/64 (0%)  | 6/64 (9%)    | 58/64 (91%)             | MAPK14,MAPK1,GRB2,MAPK3,HRAS,RASA1                                                                                 |
| Role of NFAT in Regulation of the Immune Response    | 3.68          | 0.05  | 1/200 (1%)    | 0/200 (0%) | 9/200 (5%)   | 190/200 (95%)           | GNAS,MAPK1,GRB2,MAPK3,GNAO1,GNAI1,GNAQ,PLCB3,HRAS,GNAS                                                             |
| Synaptic Long Term Depression                        | 3.67          | 0.06  | 1/161 (1%)    | 0/161 (0%) | 8/161 (5%)   | 152/161 (94%)           | GNAS,MAPK1,MAPK3,GNAO1,GNAI1,GNAQ,PLCB3,HRAS,GNAS                                                                  |
| CDK5 Signaling                                       | 3.53          | 0.07  | 0/97 (0%)     | 0/97 (0%)  | 7/97 (7%)    | 90/97 (93%)             | PRKACB,GNAS,PRKAR2B,MAPK1,MAPK3,PRKACA,HRAS                                                                        |
| Glycolysis I                                         | 3.43          | 0.10  | 0/41 (0%)     | 0/41 (0%)  | 4/41 (10%)   | 37/41 (90%)             | GPI,PFKP,PKFM,ALDOC                                                                                                |
| Synaptic Long Term Potentiation                      | 3.43          | 0.06  | 1/130 (1%)    | 0/130 (0%) | 7/130 (5%)   | 122/130 (94%)           | PRKACB,PRKAR2B,MAPK1,MAPK3,PRKACA,GNAQ,PLCB3,HRAS                                                                  |
| LXR/RXR Activation                                   | 3.40          | 0.06  | 0/139 (0%)    | 0/139 (0%) | 8/139 (6%)   | 131/139 (94%)           | KNG1,HPX,APOH,VTN,AHSG,SERPINF1,A1BG,HADH                                                                          |
| CXCR4 Signaling                                      | 3.38          | 0.05  | 1/174 (1%)    | 0/174 (0%) | 8/174 (5%)   | 165/174 (95%)           | GNAS,MAPK1,MAPK3,GNAO1,GNAI1,GNAQ,PLCB3,HRAS,GNAS                                                                  |
| Signaling by Rho Family GTPases                      | 3.24          | 0.04  | 0/262 (0%)    | 0/262 (0%) | 11/262 (4%)  | 251/262 (96%)           | ACTR2,SEPT5,GNAS,ARPC1A,MAPK1,MAPK3,GNAO1,GNAI1,GNAQ,GNAS,SEPT6                                                    |
| Glutaryl-CoA Degradation                             | 3.21          | 0.13  | 1/24 (4%)     | 0/24 (0%)  | 2/24 (8%)    | 21/24 (88%)             | ACAT2,EHHADH,HADH                                                                                                  |
| Cholecystininin/Gastrin-mediated Signaling           | 3.16          | 0.07  | 1/106 (1%)    | 0/106 (0%) | 6/106 (6%)   | 99/106 (93%)            | MAPK14,MAPK1,GRB2,MAPK3,GNAQ,PLCB3,HRAS                                                                            |
| Insulin Receptor Signaling                           | 3.15          | 0.05  | 1/149 (1%)    | 0/149 (0%) | 7/149 (5%)   | 141/149 (95%)           | PRKACB,PRKAR2B,MAPK1,GRB2,MAPK3,EIF2B5,PRKACA,HRAS                                                                 |
| Semaphorin Signaling in Neurons                      | 3.03          | 0.09  | 0/54 (0%)     | 0/54 (0%)  | 5/54 (9%)    | 49/54 (91%)             | DPYSL2,CRMP1,MAPK1,DPYSL3,MAPK3                                                                                    |
| Sphingosine-1-phosphate Signaling                    | 2.94          | 0.06  | 1/123 (1%)    | 0/123 (0%) | 6/123 (5%)   | 116/123 (94%)           | GNAS,MAPK1,MAPK3,GNAI1,GNAQ,PLCB3,ASAH1                                                                            |
| Complement System                                    | 2.89          | 0.11  | 0/35 (0%)     | 0/35 (0%)  | 4/35 (11%)   | 31/35 (89%)             | C4BPA,C8B,C1QC,C8G                                                                                                 |
| Oncostatin M Signaling                               | 2.84          | 0.11  | 0/35 (0%)     | 0/35 (0%)  | 4/35 (11%)   | 31/35 (89%)             | MAPK1,GRB2,MAPK3,HRAS                                                                                              |
| CCR3 Signaling in Eosinophils                        | 2.83          | 0.05  | 1/134 (1%)    | 0/134 (0%) | 6/134 (4%)   | 127/134 (95%)           | GNAS,MAPK14,MAPK1,MAPK3,GNAI1,PLCB3,HRAS                                                                           |
| Glioma Invasiveness Signaling                        | 2.81          | 0.08  | 0/66 (0%)     | 0/66 (0%)  | 5/66 (8%)    | 61/66 (92%)             | PLG,MAPK1,MAPK3,VTN,HRAS                                                                                           |
| p70S6K Signaling                                     | 2.72          | 0.05  | 1/132 (1%)    | 0/132 (0%) | 6/132 (5%)   | 125/132 (95%)           | MAPK1,GRB2,MAPK3,GNAI1,GNAQ,PLCB3,HRAS                                                                             |



| Ingenuity Canonical Pathways                               | -log(p-value) | Ratio | Downregulated | No change  | Upregulated | No overlap with dataset | Molecules                                           |
|------------------------------------------------------------|---------------|-------|---------------|------------|-------------|-------------------------|-----------------------------------------------------|
| Acetate Conversion to Acetyl-CoA                           | 2.69          | 0.18  | 1/11 (9%)     | 0/11 (0%)  | 1/11 (9%)   | 9/11 (82%)              | ACSS1,ACSL1                                         |
| UVA-Induced MAPK Signaling                                 | 2.67          | 0.06  | 1/98 (1%)     | 0/98 (0%)  | 5/98 (5%)   | 92/98 (94%)             | MAPK14,MAPK1,MAPK3,PLCB3,HRAS,CYCS                  |
| Cdc42 Signaling                                            | 2.60          | 0.04  | 2/186 (1%)    | 0/186 (0%) | 6/186 (3%)  | 178/186 (96%)           | ACTR2,IQGAP2,DIAPH1,MAPK14,ARPC1A,MAPK1,HLA-A,RASA1 |
| Antioxidant Action of Vitamin C                            | 2.55          | 0.05  | 1/110 (1%)    | 0/110 (0%) | 5/110 (5%)  | 104/110 (95%)           | MAPK14,MAPK1,MAPK3,PLCB3,NXN,TXNRD1                 |
| JAK/Stat Signaling                                         | 2.53          | 0.07  | 0/71 (0%)     | 0/71 (0%)  | 5/71 (7%)   | 66/71 (93%)             | MAPK1,GRB2,MAPK3,GNAQ,HRAS                          |
| Thioredoxin Pathway                                        | 2.52          | 0.25  | 0/8 (0%)      | 0/8 (0%)   | 2/8 (25%)   | 6/8 (75%)               | NXN,TXNRD1                                          |
| eNOS Signaling                                             | 2.51          | 0.05  | 1/155 (1%)    | 0/155 (0%) | 6/155 (4%)  | 148/155 (95%)           | PRKACB,KNG1,GNAS,PRKAR2B,PRKACA,GNAQ,AQP1           |
| Agrin Interactions at Neuromuscular Junction               | 2.51          | 0.07  | 2/70 (3%)     | 0/70 (0%)  | 3/70 (4%)   | 65/70 (93%)             | MAPK1,MAPK3,LAMA2,UTRN,HRAS                         |
| GDNF Family Ligand-Receptor Interactions                   | 2.51          | 0.07  | 0/76 (0%)     | 0/76 (0%)  | 5/76 (7%)   | 71/76 (93%)             | MAPK1,GRB2,MAPK3,HRAS,RASA1                         |
| UVC-Induced MAPK Signaling                                 | 2.50          | 0.09  | 0/44 (0%)     | 0/44 (0%)  | 4/44 (9%)   | 40/44 (91%)             | MAPK14,MAPK1,MAPK3,HRAS                             |
| Tryptophan Degradation III (Eukaryotic)                    | 2.48          | 0.06  | 1/48 (2%)     | 0/48 (0%)  | 2/48 (4%)   | 45/48 (94%)             | ACAT2,EHHADH,HADH                                   |
| Neuropathic Pain Signaling In Dorsal Horn Neurons          | 2.46          | 0.06  | 1/109 (1%)    | 0/109 (0%) | 5/109 (5%)  | 103/109 (94%)           | PRKACB,PRKAR2B,MAPK1,MAPK3,PRKACA,PLCB3             |
| Nitric Oxide Signaling in the Cardiovascular System        | 2.44          | 0.05  | 0/125 (0%)    | 0/125 (0%) | 6/125 (5%)  | 119/125 (95%)           | PRKACB,KNG1,PRKAR2B,MAPK1,MAPK3,PRKACA              |
| PEDF Signaling                                             | 2.43          | 0.06  | 0/79 (0%)     | 0/79 (0%)  | 5/79 (6%)   | 74/79 (94%)             | MAPK14,MAPK1,MAPK3,SERPINF1,HRAS                    |
| Rac Signaling                                              | 2.40          | 0.05  | 1/127 (1%)    | 0/127 (0%) | 5/127 (4%)  | 121/127 (95%)           | ACTR2,IQGAP2,ARPC1A,MAPK1,MAPK3,HRAS                |
| FLT3 Signaling in Hematopoietic Progenitor Cells           | 2.32          | 0.06  | 0/79 (0%)     | 0/79 (0%)  | 5/79 (6%)   | 74/79 (94%)             | MAPK14,MAPK1,GRB2,MAPK3,HRAS                        |
| IL-22 Signaling                                            | 2.31          | 0.12  | 0/25 (0%)     | 0/25 (0%)  | 3/25 (12%)  | 22/25 (88%)             | MAPK14,MAPK1,MAPK3                                  |
| Gluconeogenesis I                                          | 2.31          | 0.06  | 0/48 (0%)     | 0/48 (0%)  | 3/48 (6%)   | 45/48 (94%)             | GPI,ME1,ALDOC                                       |
| Dopamine Receptor Signaling                                | 2.30          | 0.05  | 0/96 (0%)     | 0/96 (0%)  | 5/96 (5%)   | 91/96 (95%)             | PRKACB,GNAS,PRKAR2B,PRKACA,QDPR                     |
| PDGF Signaling                                             | 2.27          | 0.06  | 0/86 (0%)     | 0/86 (0%)  | 5/86 (6%)   | 81/86 (94%)             | MAPK1,GRB2,MAPK3,HRAS,RASA1                         |
| IL-17A Signaling in Gastric Cells                          | 2.26          | 0.11  | 0/28 (0%)     | 0/28 (0%)  | 3/28 (11%)  | 25/28 (89%)             | MAPK14,MAPK1,MAPK3                                  |
| Role of JAK family kinases in IL-6-type Cytokine Signaling | 2.26          | 0.11  | 0/28 (0%)     | 0/28 (0%)  | 3/28 (11%)  | 25/28 (89%)             | MAPK14,MAPK1,MAPK3                                  |
| Triacylglycerol Degradation                                | 2.26          | 0.09  | 2/32 (6%)     | 0/32 (0%)  | 1/32 (3%)   | 29/32 (91%)             | ABHD12,CEL,PNLIPRP1                                 |
| CNTF Signaling                                             | 2.16          | 0.07  | 0/57 (0%)     | 0/57 (0%)  | 4/57 (7%)   | 53/57 (93%)             | MAPK1,GRB2,MAPK3,HRAS                               |
| Endometrial Cancer Signaling                               | 2.16          | 0.07  | 0/60 (0%)     | 0/60 (0%)  | 4/60 (7%)   | 56/60 (93%)             | MAPK1,GRB2,MAPK3,HRAS                               |
| TGF-β Signaling                                            | 2.14          | 0.06  | 0/90 (0%)     | 0/90 (0%)  | 5/90 (6%)   | 85/90 (94%)             | MAPK14,MAPK1,GRB2,MAPK3,HRAS                        |
| IL-2 Signaling                                             | 2.13          | 0.07  | 0/61 (0%)     | 0/61 (0%)  | 4/61 (7%)   | 57/61 (93%)             | MAPK1,GRB2,MAPK3,HRAS                               |
| Sperm Motility                                             | 2.12          | 0.04  | 2/143 (1%)    | 0/143 (0%) | 4/143 (3%)  | 137/143 (96%)           | PRKACB,SLC16A10,GNAS,PRKAR2B,PRKACA,PLCB3           |
| ErbB Signaling                                             | 2.10          | 0.06  | 0/90 (0%)     | 0/90 (0%)  | 5/90 (6%)   | 85/90 (94%)             | MAPK14,MAPK1,GRB2,MAPK3,HRAS                        |
| Thrombopoietin Signaling                                   | 2.08          | 0.06  | 0/64 (0%)     | 0/64 (0%)  | 4/64 (6%)   | 60/64 (94%)             | MAPK1,GRB2,MAPK3,HRAS                               |
| FGF Signaling                                              | 2.07          | 0.05  | 0/94 (0%)     | 0/94 (0%)  | 5/94 (5%)   | 89/94 (95%)             | MAPK14,MAPK1,GRB2,MAPK3,HRAS                        |
| Ketolysis                                                  | 2.06          | 0.11  | 0/19 (0%)     | 0/19 (0%)  | 2/19 (11%)  | 17/19 (89%)             | ACAT2,OXCT1                                         |
| Actin Nucleation by ARP-WASP Complex                       | 2.05          | 0.06  | 0/67 (0%)     | 0/67 (0%)  | 4/67 (6%)   | 63/67 (94%)             | ACTR2,ARPC1A,GRB2,HRAS                              |
| Superpathway of Cholesterol Biosynthesis                   | 2.03          | 0.03  | 0/87 (0%)     | 0/87 (0%)  | 3/87 (3%)   | 84/87 (97%)             | NSDHL,ACAT2,IDI1                                    |
| Sonic Hedgehog Signaling                                   | 2.03          | 0.09  | 0/35 (0%)     | 0/35 (0%)  | 3/35 (9%)   | 32/35 (91%)             | PRKACB,PRKAR2B,PRKACA                               |
| ErbB2-ErbB3 Signaling                                      | 2.02          | 0.06  | 0/63 (0%)     | 0/63 (0%)  | 4/63 (6%)   | 59/63 (94%)             | MAPK1,GRB2,MAPK3,HRAS                               |
| Regulation of Cellular Mechanics by Calpain Protease       | 2.02          | 0.05  | 0/73 (0%)     | 0/73 (0%)  | 4/73 (5%)   | 69/73 (95%)             | MAPK1,GRB2,MAPK3,HRAS                               |
| Dopamine-DARPP32 Feedback in cAMP Signaling                | 2.00          | 0.04  | 1/187 (1%)    | 0/187 (0%) | 6/187 (3%)  | 180/187 (96%)           | PRKACB,GNAS,PRKAR2B,GNAI1,PRKACA,GNAQ,PLCB3         |
| 4-1BB Signaling in T Lymphocytes                           | 1.99          | 0.08  | 0/36 (0%)     | 0/36 (0%)  | 3/36 (8%)   | 33/36 (92%)             | MAPK14,MAPK1,MAPK3                                  |
| Estrogen Receptor Signaling                                | 1.97          | 0.04  | 1/136 (1%)    | 0/136 (0%) | 5/136 (4%)  | 130/136 (96%)           | PCK2,MAPK1,GRB2,MAPK3,HRAS,CARM1                    |
| VEGF Signaling                                             | 1.95          | 0.05  | 1/109 (1%)    | 0/109 (0%) | 4/109 (4%)  | 104/109 (95%)           | MAPK1,GRB2,MAPK3,EIF2B5,HRAS                        |
| ErbB4 Signaling                                            | 1.95          | 0.06  | 0/69 (0%)     | 0/69 (0%)  | 4/69 (6%)   | 65/69 (94%)             | MAPK1,GRB2,MAPK3,HRAS                               |
| Cellular Effects of Sildenafil (Viagra)                    | 1.94          | 0.04  | 1/155 (1%)    | 0/155 (0%) | 5/155 (3%)  | 149/155 (96%)           | PRKACB,MYH10,GNAS,PRKAR2B,PRKACA,PLCB3              |
| IL-15 Signaling                                            | 1.92          | 0.06  | 0/72 (0%)     | 0/72 (0%)  | 4/72 (6%)   | 68/72 (94%)             | MAPK14,MAPK1,MAPK3,HRAS                             |
| Mouse Embryonic Stem Cell Pluripotency                     | 1.90          | 0.05  | 0/99 (0%)     | 0/99 (0%)  | 5/99 (5%)   | 94/99 (95%)             | MAPK14,MAPK1,GRB2,MAPK3,HRAS                        |
| G Protein Signaling Mediated by Tubby                      | 1.88          | 0.07  | 1/44 (2%)     | 0/44 (0%)  | 2/44 (5%)   | 41/44 (93%)             | GNAS,GNAQ,PLCB3                                     |
| Ovarian Cancer Signaling                                   | 1.88          | 0.04  | 0/152 (0%)    | 0/152 (0%) | 6/152 (4%)  | 146/152 (96%)           | PRKACB,PRKAR2B,MAPK1,MAPK3,PRKACA,HRAS              |
| GM-CSF Signaling                                           | 1.87          | 0.06  | 0/68 (0%)     | 0/68 (0%)  | 4/68 (6%)   | 64/68 (94%)             | MAPK1,GRB2,MAPK3,HRAS                               |
| RhoGDI Signaling                                           | 1.87          | 0.03  | 0/201 (0%)    | 0/201 (0%) | 7/201 (3%)  | 194/201 (97%)           | ACTR2,GNAS,ARPC1A,GNAO1,GNAI1,GNAQ,GNAZ             |
| T Cell Receptor Signaling                                  | 1.86          | 0.05  | 0/109 (0%)    | 0/109 (0%) | 5/109 (5%)  | 104/109 (95%)           | MAPK1,GRB2,MAPK3,HRAS,RASA1                         |
| RAR Activation                                             | 1.86          | 0.04  | 0/191 (0%)    | 0/191 (0%) | 7/191 (4%)  | 184/191 (96%)           | PRKACB,GNAS,MAPK14,PRKAR2B,MAPK1,PRKACA,CARM1       |
| IL-17A Signaling in Fibroblasts                            | 1.85          | 0.08  | 0/40 (0%)     | 0/40 (0%)  | 3/40 (8%)   | 37/40 (93%)             | MAPK14,MAPK1,MAPK3                                  |
| Adenine and Adenosine Salvage VI                           | 1.84          | 0.20  | 0/5 (0%)      | 0/5 (0%)   | 1/5 (20%)   | 4/5 (80%)               | ADK                                                 |
| Non-Small Cell Lung Cancer Signaling                       | 1.83          | 0.05  | 0/83 (0%)     | 0/83 (0%)  | 4/83 (5%)   | 79/83 (95%)             | MAPK1,GRB2,MAPK3,HRAS                               |
| Sertoli Cell-Sertoli Cell Junction Signaling               | 1.82          | 0.04  | 0/198 (0%)    | 0/198 (0%) | 7/198 (4%)  | 191/198 (96%)           | PRKACB,MAPK14,PRKAR2B,MAPK1,MAPK3,PRKACA,HRAS       |
| cAMP-mediated signaling                                    | 1.81          | 0.04  | 0/226 (0%)    | 0/226 (0%) | 8/226 (4%)  | 218/226 (96%)           | PRKACB,GNAS,PRKAR2B,MAPK1,MAPK3,GNAO1,GNAI1,PRKACA  |
| PXR/RXR Activation                                         | 1.78          | 0.04  | 1/92 (1%)     | 0/92 (0%)  | 3/92 (3%)   | 88/92 (96%)             | PRKACB,PRKAR2B,PCK2,PRKACA                          |
| Erythropoietin Signaling                                   | 1.78          | 0.05  | 0/79 (0%)     | 0/79 (0%)  | 4/79 (5%)   | 75/79 (95%)             | MAPK1,GRB2,MAPK3,HRAS                               |
| Role of MAPK Signaling in the Pathogenesis of Influenza    | 1.78          | 0.06  | 0/71 (0%)     | 0/71 (0%)  | 4/71 (6%)   | 67/71 (94%)             | MAPK14,MAPK1,MAPK3,HRAS                             |
| Calcium Signaling                                          | 1.78          | 0.03  | 0/217 (0%)    | 0/217 (0%) | 7/217 (3%)  | 210/217 (97%)           | PRKACB,MYH10,PRKAR2B,MAPK1,MAPK3,PRKACA,ASPH        |

| Ingenuity Canonical Pathways                                                   | -log(p-value) | Ratio | Downregulated | No change  | Upregulated | No overlap with dataset | Molecules                                                          |
|--------------------------------------------------------------------------------|---------------|-------|---------------|------------|-------------|-------------------------|--------------------------------------------------------------------|
| Huntington's Disease Signaling                                                 | 1.78          | 0.03  | 1/252 (0%)    | 0/252 (0%) | 7/252 (3%)  | 244/252 (97%)           | MAPK1,GRB2,MAPK3,GNAQ,PLCB3,HRAS,CYCS,RASA1                        |
| Chondroitin Sulfate Degradation (Metazoa)                                      | 1.77          | 0.09  | 0/23 (0%)     | 0/23 (0%)  | 2/23 (9%)   | 21/23 (91%)             | MGEA5,HEXA                                                         |
| Vitamin-C Transport                                                            | 1.77          | 0.09  | 0/22 (0%)     | 0/22 (0%)  | 2/22 (9%)   | 20/22 (91%)             | NXN,TXNRD1                                                         |
| Neurotrophin/TRK Signaling                                                     | 1.76          | 0.05  | 0/76 (0%)     | 0/76 (0%)  | 4/76 (5%)   | 72/76 (95%)             | MAPK1,GRB2,MAPK3,HRAS                                              |
| tRNA Charging                                                                  | 1.75          | 0.04  | 2/81 (2%)     | 0/81 (0%)  | 1/81 (1%)   | 78/81 (96%)             | PARS2,CARS,MARS2                                                   |
| Netrin Signaling                                                               | 1.72          | 0.05  | 0/58 (0%)     | 0/58 (0%)  | 3/58 (5%)   | 55/58 (95%)             | PRKACB,PRKAR2B,PRKACA                                              |
| CCRS Signaling in Macrophages                                                  | 1.72          | 0.04  | 0/97 (0%)     | 0/97 (0%)  | 4/97 (4%)   | 93/97 (96%)             | GNAS,MAPK14,MAPK1,GNAI1                                            |
| Renal Cell Carcinoma Signaling                                                 | 1.72          | 0.05  | 0/79 (0%)     | 0/79 (0%)  | 4/79 (5%)   | 75/79 (95%)             | MAPK1,GRB2,MAPK3,HRAS                                              |
| Isoleucine Degradation I                                                       | 1.71          | 0.07  | 1/30 (3%)     | 0/30 (0%)  | 1/30 (3%)   | 28/30 (93%)             | ACAT2,EHHADH                                                       |
| Dermatan Sulfate Degradation (Metazoa)                                         | 1.71          | 0.09  | 0/23 (0%)     | 0/23 (0%)  | 2/23 (9%)   | 21/23 (91%)             | MGEA5,HEXA                                                         |
| Mevalonate Pathway I                                                           | 1.71          | 0.07  | 0/29 (0%)     | 0/29 (0%)  | 2/29 (7%)   | 27/29 (93%)             | ACAT2,IDI1                                                         |
| IL-3 Signaling                                                                 | 1.70          | 0.05  | 0/75 (0%)     | 0/75 (0%)  | 4/75 (5%)   | 71/75 (95%)             | MAPK1,GRB2,MAPK3,HRAS                                              |
| Thyroid Cancer Signaling                                                       | 1.69          | 0.07  | 0/44 (0%)     | 0/44 (0%)  | 3/44 (7%)   | 41/44 (93%)             | MAPK1,MAPK3,HRAS                                                   |
| ERK/MAPK Signaling                                                             | 1.69          | 0.03  | 0/211 (0%)    | 0/211 (0%) | 7/211 (3%)  | 204/211 (97%)           | PRKACB,PRKAR2B,MAPK1,GRB2,MAPK3,PRKACA,HRAS                        |
| IL-17 Signaling                                                                | 1.68          | 0.05  | 0/75 (0%)     | 0/75 (0%)  | 4/75 (5%)   | 71/75 (95%)             | MAPK14,MAPK1,MAPK3,HRAS                                            |
| Regulation of eIF4 and p70S6K Signaling                                        | 1.67          | 0.03  | 1/175 (1%)    | 0/175 (0%) | 5/175 (3%)  | 169/175 (97%)           | MAPK14,MAPK1,GRB2,MAPK3,EIF2B5,HRAS                                |
| Fc Epsilon RI Signaling                                                        | 1.66          | 0.04  | 0/117 (0%)    | 0/117 (0%) | 5/117 (4%)  | 112/117 (96%)           | MAPK14,MAPK1,GRB2,MAPK3,HRAS                                       |
| LPS-stimulated MAPK Signaling                                                  | 1.66          | 0.05  | 0/83 (0%)     | 0/83 (0%)  | 4/83 (5%)   | 79/83 (95%)             | MAPK14,MAPK1,MAPK3,HRAS                                            |
| Prolactin Signaling                                                            | 1.66          | 0.05  | 0/84 (0%)     | 0/84 (0%)  | 4/84 (5%)   | 80/84 (95%)             | MAPK1,GRB2,MAPK3,HRAS                                              |
| Oxidative Ethanol Degradation III                                              | 1.65          | 0.05  | 1/40 (3%)     | 0/40 (0%)  | 1/40 (3%)   | 38/40 (95%)             | ACSS1,ACSL1                                                        |
| Melanoma Signaling                                                             | 1.64          | 0.06  | 0/50 (0%)     | 0/50 (0%)  | 3/50 (6%)   | 47/50 (94%)             | MAPK1,MAPK3,HRAS                                                   |
| Role of Tissue Factor in Cancer                                                | 1.63          | 0.04  | 0/130 (0%)    | 0/130 (0%) | 5/130 (4%)  | 125/130 (96%)           | MAPK14,MAPK1,MAPK3,GNAQ,HRAS                                       |
| Protein Kinase A Signaling                                                     | 1.62          | 0.03  | 2/407 (0%)    | 0/407 (0%) | 9/407 (2%)  | 396/407 (97%)           | PRKACB,H1FO,MYH10,GNAS,PRKAR2B,MAPK1,MAPK3,GNAI1,PRKACA,GNAQ,PLCB3 |
| Aldosterone Signaling in Epithelial Cells                                      | 1.62          | 0.04  | 1/168 (1%)    | 0/168 (0%) | 5/168 (3%)  | 162/168 (96%)           | MAPK1,MAPK3,HSPH1,PLCB3,DNAJB6,DNAJA1                              |
| Glutathione Redox Reactions I                                                  | 1.60          | 0.08  | 1/24 (4%)     | 0/24 (0%)  | 1/24 (4%)   | 22/24 (92%)             | GPX3,MGST1                                                         |
| VEGF Family Ligand-Receptor Interactions                                       | 1.60          | 0.05  | 0/88 (0%)     | 0/88 (0%)  | 4/88 (5%)   | 84/88 (95%)             | MAPK1,GRB2,MAPK3,HRAS                                              |
| Xenobiotic Metabolism Signaling                                                | 1.60          | 0.03  | 4/304 (1%)    | 0/304 (0%) | 5/304 (2%)  | 295/304 (97%)           | CEL,MGST1,MAPK14,ALDH1L2,MAPK1,MAPK3,GCLC,HRAS,PNPLA6              |
| Colorectal Cancer Metastasis Signaling                                         | 1.59          | 0.03  | 0/268 (0%)    | 0/268 (0%) | 8/268 (3%)  | 260/268 (97%)           | PRKACB,GNAS,PRKAR2B,MAPK1,GRB2,MAPK3,PRKACA,HRAS                   |
| Acute Myeloid Leukemia Signaling                                               | 1.59          | 0.05  | 0/84 (0%)     | 0/84 (0%)  | 4/84 (5%)   | 80/84 (95%)             | MAPK1,GRB2,MAPK3,HRAS                                              |
| Germ Cell-Sertoli Cell Junction Signaling                                      | 1.57          | 0.04  | 1/169 (1%)    | 0/169 (0%) | 5/169 (3%)  | 163/169 (96%)           | MAPK14,MAPK1,MAPK3,HRAS,LAMC3,GSN                                  |
| IL-6 Signaling                                                                 | 1.56          | 0.04  | 0/124 (0%)    | 0/124 (0%) | 5/124 (4%)  | 119/124 (96%)           | MAPK14,MAPK1,GRB2,MAPK3,HRAS                                       |
| Ethanol Degradation IV                                                         | 1.56          | 0.07  | 1/29 (3%)     | 0/29 (0%)  | 1/29 (3%)   | 27/29 (93%)             | ACSS1,ACSL1                                                        |
| Regulation of IL-2 Expression in Activated and Anergic T Lymphocytes           | 1.55          | 0.04  | 0/89 (0%)     | 0/89 (0%)  | 4/89 (4%)   | 85/89 (96%)             | MAPK1,GRB2,MAPK3,HRAS                                              |
| 14-3-3-mediated Signaling                                                      | 1.55          | 0.04  | 1/121 (1%)    | 0/121 (0%) | 4/121 (3%)  | 116/121 (96%)           | MAPK1,GRB2,MAPK3,PLCB3,HRAS                                        |
| RhoA Signaling                                                                 | 1.55          | 0.04  | 0/122 (0%)    | 0/122 (0%) | 5/122 (4%)  | 117/122 (96%)           | ACTR2,SEPT5,ARPC1A,PFN2,SEPT6                                      |
| Superpathway of Geranylgeranyldiphosphate Biosynthesis I                       | 1.51          | 0.05  | 0/37 (0%)     | 0/37 (0%)  | 2/37 (5%)   | 35/37 (95%)             | ACAT2,IDI1                                                         |
| Regulation of Actin-based Motility by Rho                                      | 1.50          | 0.04  | 0/91 (0%)     | 0/91 (0%)  | 4/91 (4%)   | 87/91 (96%)             | ACTR2,ARPC1A,PFN2,GSN                                              |
| Retinol Biosynthesis                                                           | 1.49          | 0.05  | 2/58 (3%)     | 0/58 (0%)  | 1/58 (2%)   | 55/58 (95%)             | CEL,PNLIPRP1,PNPLA6                                                |
| Prostate Cancer Signaling                                                      | 1.48          | 0.04  | 0/103 (0%)    | 0/103 (0%) | 4/103 (4%)  | 99/103 (96%)            | MAPK1,GRB2,MAPK3,HRAS                                              |
| Role of Macrophages, Fibroblasts and Endothelial Cells in Rheumatoid Arthritis | 1.45          | 0.03  | 2/342 (1%)    | 0/342 (0%) | 7/342 (2%)  | 333/342 (97%)           | FN1,MAPK14,MAPK1,MAPK3,GNAO1,GNAQ,PLCB3,HRAS,PRSS1                 |
| Salvage Pathways of Pyrimidine Ribonucleotides                                 | 1.45          | 0.04  | 1/103 (1%)    | 0/103 (0%) | 3/103 (3%)  | 99/103 (96%)            | FAM20B,MAPK1,MAPK3,A1CF                                            |
| Glucocorticoid Receptor Signaling                                              | 1.42          | 0.03  | 1/299 (0%)    | 0/299 (0%) | 7/299 (2%)  | 291/299 (97%)           | PRKACB,MAPK14,PCK2,MAPK1,GRB2,MAPK3,PRKACA,HRAS                    |
| FAK Signaling                                                                  | 1.42          | 0.04  | 0/106 (0%)    | 0/106 (0%) | 4/106 (4%)  | 102/106 (96%)           | MAPK1,GRB2,MAPK3,HRAS                                              |
| RANK Signaling in Osteoclasts                                                  | 1.42          | 0.04  | 0/97 (0%)     | 0/97 (0%)  | 4/97 (4%)   | 93/97 (96%)             | MAPK14,MAPK1,MAPK3,GSN                                             |
| Neuregulin Signaling                                                           | 1.40          | 0.04  | 0/104 (0%)    | 0/104 (0%) | 4/104 (4%)  | 100/104 (96%)           | MAPK1,GRB2,MAPK3,HRAS                                              |
| PAK Signaling                                                                  | 1.40          | 0.04  | 0/110 (0%)    | 0/110 (0%) | 4/110 (4%)  | 106/110 (96%)           | MAPK1,GRB2,MAPK3,HRAS                                              |
| Apoptosis Signaling                                                            | 1.40          | 0.04  | 0/100 (0%)    | 0/100 (0%) | 4/100 (4%)  | 96/100 (96%)            | MAPK1,MAPK3,HRAS,CYCS                                              |
| UVB-Induced MAPK Signaling                                                     | 1.38          | 0.05  | 0/58 (0%)     | 0/58 (0%)  | 3/58 (5%)   | 55/58 (95%)             | MAPK14,MAPK1,MAPK3                                                 |
| Phototransduction Pathway                                                      | 1.38          | 0.04  | 0/67 (0%)     | 0/67 (0%)  | 3/67 (4%)   | 64/67 (96%)             | PRKACB,PRKAR2B,PRKACA                                              |
| Methylglyoxal Degradation I                                                    | 1.37          | 0.09  | 0/11 (0%)     | 0/11 (0%)  | 1/11 (9%)   | 10/11 (91%)             | HAGH                                                               |
| Glutathione Biosynthesis                                                       | 1.37          | 0.09  | 1/11 (9%)     | 0/11 (0%)  | 0/11 (0%)   | 10/11 (91%)             | GCLC                                                               |
| N-acetylglucosamine Degradation I                                              | 1.37          | 0.13  | 0/8 (0%)      | 0/8 (0%)   | 1/8 (13%)   | 7/8 (88%)               | GNPDA2                                                             |
| TCA Cycle II (Eukaryotic)                                                      | 1.36          | 0.05  | 0/41 (0%)     | 0/41 (0%)  | 2/41 (5%)   | 39/41 (95%)             | SUCLA2,IDH3G                                                       |
| Role of IL-17A in Arthritis                                                    | 1.36          | 0.05  | 0/64 (0%)     | 0/64 (0%)  | 3/64 (5%)   | 61/64 (95%)             | MAPK14,MAPK1,MAPK3                                                 |
| HMGB1 Signaling                                                                | 1.33          | 0.04  | 0/109 (0%)    | 0/109 (0%) | 4/109 (4%)  | 105/109 (96%)           | MAPK14,MAPK1,MAPK3,HRAS                                            |
| Tumoricidal Function of Hepatic Natural Killer Cells                           | 1.33          | 0.07  | 0/27 (0%)     | 0/27 (0%)  | 2/27 (7%)   | 25/27 (93%)             | M6PR,CYCS                                                          |
| Toll-like Receptor Signaling                                                   | 1.32          | 0.05  | 0/64 (0%)     | 0/64 (0%)  | 3/64 (5%)   | 61/64 (95%)             | ECST1,MAPK14,MAPK1                                                 |
| Chronic Myeloid Leukemia Signaling                                             | 1.31          | 0.04  | 0/106 (0%)    | 0/106 (0%) | 4/106 (4%)  | 102/106 (96%)           | MAPK1,GRB2,MAPK3,HRAS                                              |
| PPAR Signaling                                                                 | 1.31          | 0.04  | 0/107 (0%)    | 0/107 (0%) | 4/107 (4%)  | 103/107 (96%)           | MAPK1,GRB2,MAPK3,HRAS                                              |
| Glioma Signaling                                                               | 1.30          | 0.04  | 0/113 (0%)    | 0/113 (0%) | 4/113 (4%)  | 109/113 (96%)           | MAPK1,GRB2,MAPK3,HRAS                                              |

| Ingenuity Canonical Pathways                                | -log(p-value) | Ratio | Downregulated | No change  | Upregulated | No overlap with dataset | Molecules                             |
|-------------------------------------------------------------|---------------|-------|---------------|------------|-------------|-------------------------|---------------------------------------|
| Myc Mediated Apoptosis Signaling                            | 1.28          | 0.05  | 0/63 (0%)     | 0/63 (0%)  | 3/63 (5%)   | 60/63 (95%)             | GRB2,HRAS,CYCS                        |
| Hepatic Cholestasis                                         | 1.28          | 0.03  | 1/183 (1%)    | 0/183 (0%) | 4/183 (2%)  | 178/183 (97%)           | PRKACB,GNAS,PRKAR2B,PRKACA,ATP8B1     |
| TREM1 Signaling                                             | 1.26          | 0.04  | 0/75 (0%)     | 0/75 (0%)  | 3/75 (4%)   | 72/75 (96%)             | MAPK1,GRB2,MAPK3                      |
| Phospholipase C Signaling                                   | 1.25          | 0.03  | 1/265 (0%)    | 0/265 (0%) | 6/265 (2%)  | 258/265 (97%)           | GNAS,MAPK1,GRB2,MAPK3,GNAQ,PLCB3,HRAS |
| Uracil Degradation II (Reductive)                           | 1.24          | 0.09  | 0/11 (0%)     | 0/11 (0%)  | 1/11 (9%)   | 10/11 (91%)             | DPYSL2                                |
| Trehalose Degradation II (Trehalase)                        | 1.24          | 0.11  | 0/9 (0%)      | 0/9 (0%)   | 1/9 (11%)   | 8/9 (89%)               | HK1                                   |
| Heme Biosynthesis from Uroporphyrinogen-III I               | 1.24          | 0.09  | 0/11 (0%)     | 0/11 (0%)  | 1/11 (9%)   | 10/11 (91%)             | CPOX                                  |
| Thymine Degradation                                         | 1.24          | 0.09  | 0/11 (0%)     | 0/11 (0%)  | 1/11 (9%)   | 10/11 (91%)             | DPYSL2                                |
| Arginine Degradation I (Arginase Pathway)                   | 1.24          | 0.08  | 0/13 (0%)     | 0/13 (0%)  | 1/13 (8%)   | 12/13 (92%)             | OAT                                   |
| N-acetylglucosamine Degradation II                          | 1.24          | 0.08  | 0/12 (0%)     | 0/12 (0%)  | 1/12 (8%)   | 11/12 (92%)             | GNPDA2                                |
| HGF Signaling                                               | 1.23          | 0.04  | 0/111 (0%)    | 0/111 (0%) | 4/111 (4%)  | 107/111 (96%)           | MAPK1,GRB2,MAPK3,HRAS                 |
| Paxillin Signaling                                          | 1.22          | 0.03  | 0/117 (0%)    | 0/117 (0%) | 4/117 (3%)  | 113/117 (97%)           | MAPK14,MAPK1,GRB2,HRAS                |
| Telomerase Signaling                                        | 1.22          | 0.04  | 0/106 (0%)    | 0/106 (0%) | 4/106 (4%)  | 102/106 (96%)           | MAPK1,GRB2,MAPK3,HRAS                 |
| HIF1α ± Signaling                                           | 1.20          | 0.04  | 0/112 (0%)    | 0/112 (0%) | 4/112 (4%)  | 108/112 (96%)           | MAPK14,MAPK1,MAPK3,HRAS               |
| Glioblastoma Multiforme Signaling                           | 1.19          | 0.03  | 1/168 (1%)    | 0/168 (0%) | 4/168 (2%)  | 163/168 (97%)           | MAPK1,GRB2,MAPK3,PLCB3,HRAS           |
| CD40 Signaling                                              | 1.19          | 0.04  | 0/71 (0%)     | 0/71 (0%)  | 3/71 (4%)   | 68/71 (96%)             | MAPK14,MAPK1,MAPK3                    |
| Estrogen-Dependent Breast Cancer Signaling                  | 1.19          | 0.04  | 0/73 (0%)     | 0/73 (0%)  | 3/73 (4%)   | 70/73 (96%)             | MAPK1,MAPK3,HRAS                      |
| Antiproliferative Role of Somatostatin Receptor 2           | 1.18          | 0.04  | 0/72 (0%)     | 0/72 (0%)  | 3/72 (4%)   | 69/72 (96%)             | MAPK1,MAPK3,HRAS                      |
| IL-17A Signaling in Airway Cells                            | 1.18          | 0.04  | 0/76 (0%)     | 0/76 (0%)  | 3/76 (4%)   | 73/76 (96%)             | MAPK14,MAPK1,MAPK3                    |
| Integrin Signaling                                          | 1.16          | 0.03  | 0/208 (0%)    | 0/208 (0%) | 6/208 (3%)  | 202/208 (97%)           | ACTR2,ARPC1A,MAPK1,GRB2,MAPK3,HRAS    |
| Angiopoietin Signaling                                      | 1.16          | 0.04  | 0/75 (0%)     | 0/75 (0%)  | 3/75 (4%)   | 72/75 (96%)             | GRB2,HRAS,RASA1                       |
| Role of PI3K/AKT Signaling in the Pathogenesis of Influenza | 1.16          | 0.04  | 0/76 (0%)     | 0/76 (0%)  | 3/76 (4%)   | 73/76 (96%)             | MAPK1,MAPK3,GNAI1                     |
| Pyridoxal 5'-phosphate Salvage Pathway                      | 1.16          | 0.04  | 0/75 (0%)     | 0/75 (0%)  | 3/75 (4%)   | 72/75 (96%)             | FAM20B,MAPK1,MAPK3                    |
| Proline Biosynthesis II (from Arginine)                     | 1.15          | 0.05  | 0/20 (0%)     | 0/20 (0%)  | 1/20 (5%)   | 19/20 (95%)             | OAT                                   |
| CMP-N-acetylneuraminate Biosynthesis I (Eukaryotes)         | 1.15          | 0.06  | 0/18 (0%)     | 0/18 (0%)  | 1/18 (6%)   | 17/18 (94%)             | CMAS                                  |
| Lysine Degradation II                                       | 1.15          | 0.05  | 0/19 (0%)     | 0/19 (0%)  | 1/19 (5%)   | 18/19 (95%)             | AASS                                  |
| Trans, trans-farnesyl Diphosphate Biosynthesis              | 1.15          | 0.10  | 0/10 (0%)     | 0/10 (0%)  | 1/10 (10%)  | 9/10 (90%)              | ID1I                                  |
| Phenylalanine Degradation I (Aerobic)                       | 1.15          | 0.08  | 0/12 (0%)     | 0/12 (0%)  | 1/12 (8%)   | 11/12 (92%)             | QDPR                                  |
| NGF Signaling                                               | 1.15          | 0.03  | 0/122 (0%)    | 0/122 (0%) | 4/122 (3%)  | 118/122 (97%)           | MAPK1,GRB2,MAPK3,HRAS                 |
| Type I Diabetes Mellitus Signaling                          | 1.14          | 0.03  | 0/121 (0%)    | 0/121 (0%) | 4/121 (3%)  | 117/121 (97%)           | MAPK14,MAPK1,HLA-A,CYCS               |
| Tight Junction Signaling                                    | 1.13          | 0.03  | 0/167 (0%)    | 0/167 (0%) | 5/167 (3%)  | 162/167 (97%)           | PRKACB,MYH10,PRKAR2B,NUDT21,PRKACA    |
| Natural Killer Cell Signaling                               | 1.11          | 0.03  | 0/118 (0%)    | 0/118 (0%) | 4/118 (3%)  | 114/118 (97%)           | MAPK1,GRB2,MAPK3,HRAS                 |
| Tec Kinase Signaling                                        | 1.11          | 0.03  | 0/184 (0%)    | 0/184 (0%) | 5/184 (3%)  | 179/184 (97%)           | GNAS,GNAO1,GNAI1,GNAQ,GNAZ            |
| Role of NANOG in Mammalian Embryonic Stem Cell Pluripotency | 1.10          | 0.03  | 0/118 (0%)    | 0/118 (0%) | 4/118 (3%)  | 114/118 (97%)           | MAPK1,GRB2,MAPK3,HRAS                 |
| MIF-mediated Glucocorticoid Regulation                      | 1.08          | 0.05  | 0/42 (0%)     | 0/42 (0%)  | 2/42 (5%)   | 40/42 (95%)             | MAPK1,MAPK3                           |
| Ethanol Degradation II                                      | 1.08          | 0.05  | 1/43 (2%)     | 0/43 (0%)  | 1/43 (2%)   | 41/43 (95%)             | ACSS1,ACSL1                           |
| B Cell Receptor Signaling                                   | 1.08          | 0.03  | 0/175 (0%)    | 0/175 (0%) | 5/175 (3%)  | 170/175 (97%)           | MAPK14,MAPK1,GRB2,MAPK3,HRAS          |
| Arginine Biosynthesis IV                                    | 1.07          | 0.04  | 0/24 (0%)     | 0/24 (0%)  | 1/24 (4%)   | 23/24 (96%)             | OAT                                   |
| Arginine Degradation VI (Arginase 2 Pathway)                | 1.07          | 0.06  | 0/16 (0%)     | 0/16 (0%)  | 1/16 (6%)   | 15/16 (94%)             | OAT                                   |
| Selenocysteine Biosynthesis II (Archaea and Eukaryotes)     | 1.07          | 0.06  | 0/17 (0%)     | 0/17 (0%)  | 1/17 (6%)   | 16/17 (94%)             | SEPHS1                                |
| UDP-N-acetyl-D-glucosamine Biosynthesis II                  | 1.07          | 0.06  | 1/17 (6%)     | 0/17 (0%)  | 0/17 (0%)   | 16/17 (94%)             | UAP1                                  |
| Ceramide Degradation                                        | 1.07          | 0.07  | 0/14 (0%)     | 0/14 (0%)  | 1/14 (7%)   | 13/14 (93%)             | ASAH1                                 |
| Zymosterol Biosynthesis                                     | 1.07          | 0.05  | 0/22 (0%)     | 0/22 (0%)  | 1/22 (5%)   | 21/22 (95%)             | NSDHL                                 |
| Tyrosine Degradation I                                      | 1.07          | 0.07  | 0/15 (0%)     | 0/15 (0%)  | 1/15 (7%)   | 14/15 (93%)             | FAH                                   |
| GDP-mannose Biosynthesis                                    | 1.07          | 0.08  | 0/13 (0%)     | 0/13 (0%)  | 1/13 (8%)   | 12/13 (92%)             | GPI                                   |
| Inhibition of Angiogenesis by TSP1                          | 1.06          | 0.05  | 0/42 (0%)     | 0/42 (0%)  | 2/42 (5%)   | 40/42 (95%)             | MAPK14,MAPK1                          |
| Type II Diabetes Mellitus Signaling                         | 1.05          | 0.02  | 0/171 (0%)    | 0/171 (0%) | 4/171 (2%)  | 167/171 (98%)           | MAPK1,MAPK3,ABCC8,ACSL1               |
| PTEN Signaling                                              | 1.04          | 0.03  | 0/138 (0%)    | 0/138 (0%) | 4/138 (3%)  | 134/138 (97%)           | MAPK1,GRB2,MAPK3,HRAS                 |
| Coagulation System                                          | 1.04          | 0.05  | 0/38 (0%)     | 0/38 (0%)  | 2/38 (5%)   | 36/38 (95%)             | KNG1,PLG                              |
| Phosphatidylcholine Biosynthesis I                          | 1.01          | 0.06  | 0/17 (0%)     | 0/17 (0%)  | 1/17 (6%)   | 16/17 (94%)             | PCYT1A                                |
| PI3K/AKT Signaling                                          | 0.98          | 0.03  | 0/152 (0%)    | 0/152 (0%) | 4/152 (3%)  | 148/152 (97%)           | MAPK1,GRB2,MAPK3,HRAS                 |
| April Mediated Signaling                                    | 0.98          | 0.05  | 0/44 (0%)     | 0/44 (0%)  | 2/44 (5%)   | 42/44 (95%)             | MAPK14,MAPK1                          |
| Docosahexaenoic Acid (DHA) Signaling                        | 0.96          | 0.04  | 0/50 (0%)     | 0/50 (0%)  | 2/50 (4%)   | 48/50 (96%)             | SERPINF1,CYCS                         |
| Sphingosine and Sphingosine-1-phosphate Metabolism          | 0.96          | 0.05  | 0/21 (0%)     | 0/21 (0%)  | 1/21 (5%)   | 20/21 (95%)             | ASAH1                                 |
| Sucrose Degradation V (Mammalian)                           | 0.96          | 0.05  | 0/19 (0%)     | 0/19 (0%)  | 1/19 (5%)   | 18/19 (95%)             | ALDOC                                 |
| Citrulline Biosynthesis                                     | 0.96          | 0.04  | 0/26 (0%)     | 0/26 (0%)  | 1/26 (4%)   | 25/26 (96%)             | OAT                                   |
| Glycoaminoglycan-protein Linkage Region Biosynthesis        | 0.96          | 0.06  | 0/16 (0%)     | 0/16 (0%)  | 1/16 (6%)   | 15/16 (94%)             | B3GAT3                                |
| GDP-glucose Biosynthesis                                    | 0.96          | 0.05  | 0/19 (0%)     | 0/19 (0%)  | 1/19 (5%)   | 18/19 (95%)             | HK1                                   |
| Ceramide Signaling                                          | 0.95          | 0.03  | 0/91 (0%)     | 0/91 (0%)  | 3/91 (3%)   | 88/91 (97%)             | MAPK3,HRAS,CYCS                       |
| Role of PKR in Interferon Induction and Antiviral Response  | 0.94          | 0.04  | 0/49 (0%)     | 0/49 (0%)  | 2/49 (4%)   | 47/49 (96%)             | MAPK14,CYCS                           |

| Ingenuity Canonical Pathways                                                 | -log(p-value) | Ratio | Downregulated | No change  | Upregulated | No overlap with dataset | Molecules                              |
|------------------------------------------------------------------------------|---------------|-------|---------------|------------|-------------|-------------------------|----------------------------------------|
| B Cell Activating Factor Signaling                                           | 0.94          | 0.04  | 0/46 (0%)     | 0/46 (0%)  | 2/46 (4%)   | 44/46 (96%)             | MAPK14,MAPK1                           |
| PI3K Signaling in B Lymphocytes                                              | 0.93          | 0.03  | 1/143 (1%)    | 0/143 (0%) | 3/143 (2%)  | 139/143 (97%)           | MAPK1,MAPK3,PLCB3,HRAS                 |
| Dendritic Cell Maturation                                                    | 0.92          | 0.02  | 1/211 (0%)    | 0/211 (0%) | 4/211 (2%)  | 206/211 (98%)           | MAPK14,MAPK1,HLA-A,MAPK3,PLCB3         |
| MIF Regulation of Innate Immunity                                            | 0.92          | 0.04  | 0/52 (0%)     | 0/52 (0%)  | 2/52 (4%)   | 50/52 (96%)             | MAPK1,MAPK3                            |
| FcγRIIB Signaling in B Lymphocytes                                           | 0.92          | 0.03  | 0/64 (0%)     | 0/64 (0%)  | 2/64 (3%)   | 62/64 (97%)             | GRB2,HRAS                              |
| Assembly of RNA Polymerase I Complex                                         | 0.91          | 0.08  | 0/13 (0%)     | 0/13 (0%)  | 1/13 (8%)   | 12/13 (92%)             | POLR1C                                 |
| Glucose and Glucose-1-phosphate Degradation                                  | 0.91          | 0.04  | 0/24 (0%)     | 0/24 (0%)  | 1/24 (4%)   | 23/24 (96%)             | HK1                                    |
| EIF2 Signaling                                                               | 0.88          | 0.02  | 1/201 (0%)    | 0/201 (0%) | 4/201 (2%)  | 196/201 (98%)           | MAPK1,GRB2,MAPK3,EIF2B5,HRAS           |
| iNOS Signaling                                                               | 0.87          | 0.04  | 0/53 (0%)     | 0/53 (0%)  | 2/53 (4%)   | 51/53 (96%)             | MAPK14,MAPK1                           |
| Heme Biosynthesis II                                                         | 0.87          | 0.04  | 0/24 (0%)     | 0/24 (0%)  | 1/24 (4%)   | 23/24 (96%)             | CPOX                                   |
| CTLA4 Signaling in Cytotoxic T Lymphocytes                                   | 0.86          | 0.03  | 0/96 (0%)     | 0/96 (0%)  | 3/96 (3%)   | 93/96 (97%)             | GRB2,HLA-A,AP1M1                       |
| IL-8 Signaling                                                               | 0.86          | 0.02  | 0/225 (0%)    | 0/225 (0%) | 5/225 (2%)  | 220/225 (98%)           | GNAS,MAPK1,MAPK3,GNAI1,HRAS            |
| Role of IL-17F in Allergic Inflammatory Airway Diseases                      | 0.86          | 0.04  | 0/48 (0%)     | 0/48 (0%)  | 2/48 (4%)   | 46/48 (96%)             | MAPK1,MAPK3                            |
| Bladder Cancer Signaling                                                     | 0.85          | 0.03  | 0/97 (0%)     | 0/97 (0%)  | 3/97 (3%)   | 94/97 (97%)             | MAPK1,MAPK3,HRAS                       |
| Aryl Hydrocarbon Receptor Signaling                                          | 0.83          | 0.02  | 2/171 (1%)    | 0/171 (0%) | 2/171 (1%)  | 167/171 (98%)           | MGST1,ALDH1L2,MAPK1,MAPK3              |
| Ketogenesis                                                                  | 0.83          | 0.05  | 0/21 (0%)     | 0/21 (0%)  | 1/21 (5%)   | 20/21 (95%)             | ACAT2                                  |
| Cleavage and Polyadenylation of Pre-mRNA                                     | 0.79          | 0.08  | 0/13 (0%)     | 0/13 (0%)  | 1/13 (8%)   | 12/13 (92%)             | NUDT21                                 |
| Guanosine Nucleotides Degradation III                                        | 0.79          | 0.05  | 1/22 (5%)     | 0/22 (0%)  | 0/22 (0%)   | 21/22 (95%)             | AOX1                                   |
| Epithelial Adherens Junction Signaling                                       | 0.78          | 0.03  | 0/154 (0%)    | 0/154 (0%) | 4/154 (3%)  | 150/154 (97%)           | MYH10,ACTR2,ARPC1A,HRAS                |
| Role of Pattern Recognition Receptors in Recognition of Bacteria and Viruses | 0.78          | 0.03  | 0/109 (0%)    | 0/109 (0%) | 3/109 (3%)  | 106/109 (97%)           | MAPK1,MAPK3,C1QC                       |
| Protein Ubiquitination Pathway                                               | 0.77          | 0.02  | 0/270 (0%)    | 0/270 (0%) | 6/270 (2%)  | 264/270 (98%)           | UCHL1,HLA-A,HSPH1,PSMD14,DNAJB6,DNAJA1 |
| Assembly of RNA Polymerase III Complex                                       | 0.76          | 0.06  | 0/16 (0%)     | 0/16 (0%)  | 1/16 (6%)   | 15/16 (94%)             | SF3A1                                  |
| Fatty Acid Activation                                                        | 0.76          | 0.05  | 0/19 (0%)     | 0/19 (0%)  | 1/19 (5%)   | 18/19 (95%)             | ACSL1                                  |
| Choline Biosynthesis III                                                     | 0.76          | 0.05  | 0/22 (0%)     | 0/22 (0%)  | 1/22 (5%)   | 21/22 (95%)             | PCYT1A                                 |
| Cholesterol Biosynthesis I                                                   | 0.76          | 0.03  | 0/40 (0%)     | 0/40 (0%)  | 1/40 (3%)   | 39/40 (98%)             | NSDHL                                  |
| Urate Biosynthesis/Inosine 5'-phosphate Degradation                          | 0.76          | 0.05  | 1/22 (5%)     | 0/22 (0%)  | 0/22 (0%)   | 21/22 (95%)             | AOX1                                   |
| Bile Acid Biosynthesis, Neutral Pathway                                      | 0.76          | 0.02  | 0/58 (0%)     | 0/58 (0%)  | 1/58 (2%)   | 57/58 (98%)             | AMACR                                  |
| Cholesterol Biosynthesis II (via 24,25-dihydroxysterol)                      | 0.76          | 0.03  | 0/40 (0%)     | 0/40 (0%)  | 1/40 (3%)   | 39/40 (98%)             | NSDHL                                  |
| Cholesterol Biosynthesis III (via Desmosterol)                               | 0.76          | 0.03  | 0/40 (0%)     | 0/40 (0%)  | 1/40 (3%)   | 39/40 (98%)             | NSDHL                                  |
| Nicotine Degradation III                                                     | 0.76          | 0.03  | 1/73 (1%)     | 0/73 (0%)  | 1/73 (1%)   | 71/73 (97%)             | B3GAT3,AOX1                            |
| Superpathway of Citrulline Metabolism                                        | 0.73          | 0.03  | 0/38 (0%)     | 0/38 (0%)  | 1/38 (3%)   | 37/38 (97%)             | OAT                                    |
| Colanic Acid Building Blocks Biosynthesis                                    | 0.73          | 0.03  | 0/36 (0%)     | 0/36 (0%)  | 1/36 (3%)   | 35/36 (97%)             | GPI                                    |
| Mitochondrial Dysfunction                                                    | 0.73          | 0.02  | 0/201 (0%)    | 0/201 (0%) | 4/201 (2%)  | 197/201 (98%)           | SURF1,NDUFS6,DHODH,CYCS                |
| nNOS Signaling in Skeletal Muscle Cells                                      | 0.70          | 0.03  | 1/31 (3%)     | 0/31 (0%)  | 0/31 (0%)   | 30/31 (97%)             | DMD                                    |
| CDP-diacylglycerol Biosynthesis I                                            | 0.70          | 0.04  | 1/27 (4%)     | 0/27 (0%)  | 0/27 (0%)   | 26/27 (96%)             | LCLAT1                                 |
| Adenosine Nucleotides Degradation II                                         | 0.70          | 0.04  | 1/26 (4%)     | 0/26 (0%)  | 0/26 (0%)   | 25/26 (96%)             | AOX1                                   |
| Pancreatic Adenocarcinoma Signaling                                          | 0.69          | 0.02  | 0/128 (0%)    | 0/128 (0%) | 3/128 (2%)  | 125/128 (98%)           | MAPK1,GRB2,MAPK3                       |
| Granzyme B Signaling                                                         | 0.68          | 0.06  | 0/18 (0%)     | 0/18 (0%)  | 1/18 (6%)   | 17/18 (94%)             | CYCS                                   |
| Phosphatidylglycerol Biosynthesis II (Non-plastidic)                         | 0.66          | 0.03  | 1/33 (3%)     | 0/33 (0%)  | 0/33 (0%)   | 32/33 (97%)             | LCLAT1                                 |
| Mitochondrial L-carnitine Shuttle Pathway                                    | 0.66          | 0.05  | 0/22 (0%)     | 0/22 (0%)  | 1/22 (5%)   | 21/22 (95%)             | ACSL1                                  |
| Nicotine Degradation II                                                      | 0.65          | 0.02  | 1/85 (1%)     | 0/85 (0%)  | 1/85 (1%)   | 83/85 (98%)             | B3GAT3,AOX1                            |
| Valine Degradation I                                                         | 0.63          | 0.03  | 1/35 (3%)     | 0/35 (0%)  | 0/35 (0%)   | 34/35 (97%)             | EHHADH                                 |
| Purine Nucleotides Degradation II (Aerobic)                                  | 0.63          | 0.03  | 1/35 (3%)     | 0/35 (0%)  | 0/35 (0%)   | 34/35 (97%)             | AOX1                                   |
| D-myo-inositol (1,4,5)-trisphosphate Degradation                             | 0.63          | 0.04  | 0/23 (0%)     | 0/23 (0%)  | 1/23 (4%)   | 22/23 (96%)             | PMPCA                                  |
| ERK5 Signaling                                                               | 0.62          | 0.03  | 0/68 (0%)     | 0/68 (0%)  | 2/68 (3%)   | 66/68 (97%)             | GNAQ,HRAS                              |
| CD28 Signaling in T Helper Cells                                             | 0.62          | 0.02  | 0/136 (0%)    | 0/136 (0%) | 3/136 (2%)  | 133/136 (98%)           | ACTR2,ARPC1A,GRB2                      |
| Granzyme A Signaling                                                         | 0.61          | 0.05  | 1/20 (5%)     | 0/20 (0%)  | 0/20 (0%)   | 19/20 (95%)             | H1FO                                   |
| 1D-myo-inositol Hexakisphosphate Biosynthesis II (Mammalian)                 | 0.61          | 0.04  | 0/28 (0%)     | 0/28 (0%)  | 1/28 (4%)   | 27/28 (96%)             | PMPCA                                  |
| D-myo-inositol (1,3,4)-trisphosphate Biosynthesis                            | 0.61          | 0.04  | 0/25 (0%)     | 0/25 (0%)  | 1/25 (4%)   | 24/25 (96%)             | PMPCA                                  |
| DNA Methylation and Transcriptional Repression Signaling                     | 0.59          | 0.04  | 0/23 (0%)     | 0/23 (0%)  | 1/23 (4%)   | 22/23 (96%)             | RBBP4                                  |
| Retinoic acid Mediated Apoptosis Signaling                                   | 0.59          | 0.03  | 0/73 (0%)     | 0/73 (0%)  | 2/73 (3%)   | 71/73 (97%)             | DAP3,CYCS                              |
| IL-10 Signaling                                                              | 0.58          | 0.03  | 0/78 (0%)     | 0/78 (0%)  | 2/78 (3%)   | 76/78 (97%)             | MAPK14,MAPK1                           |
| Remodeling of Epithelial Adherens Junctions                                  | 0.58          | 0.03  | 0/70 (0%)     | 0/70 (0%)  | 2/70 (3%)   | 68/70 (97%)             | ACTR2,ARPC1A                           |
| Growth Hormone Signaling                                                     | 0.58          | 0.03  | 0/78 (0%)     | 0/78 (0%)  | 2/78 (3%)   | 76/78 (97%)             | MAPK1,MAPK3                            |
| Regulation of the Epithelial-Mesenchymal Transition Pathway                  | 0.57          | 0.02  | 0/196 (0%)    | 0/196 (0%) | 4/196 (2%)  | 192/196 (98%)           | MAPK1,GRB2,MAPK3,HRAS                  |
| Clathrin-mediated Endocytosis Signaling                                      | 0.55          | 0.02  | 0/198 (0%)    | 0/198 (0%) | 4/198 (2%)  | 194/198 (98%)           | ACTR2,ARPC1A,GRB2,PICALM               |
| Superpathway of Inositol Phosphate Compounds                                 | 0.54          | 0.02  | 1/230 (0%)    | 0/230 (0%) | 3/230 (1%)  | 226/230 (98%)           | NUDT3,PLCB3,RASA1,PMPCA                |
| ILK Signaling                                                                | 0.54          | 0.02  | 0/205 (0%)    | 0/205 (0%) | 4/205 (2%)  | 201/205 (98%)           | MYH10,FN1,MAPK1,MAPK3                  |
| IL-4 Signaling                                                               | 0.53          | 0.03  | 0/80 (0%)     | 0/80 (0%)  | 2/80 (3%)   | 78/80 (98%)             | GRB2,HRAS                              |
| Superpathway of D-myo-inositol (1,4,5)-trisphosphate Metabolism              | 0.53          | 0.03  | 0/33 (0%)     | 0/33 (0%)  | 1/33 (3%)   | 32/33 (97%)             | PMPCA                                  |

|                                                                           | -log(p-value) | Ratio | Downregulated | No change  | Upregulated | No overlap with dataset | Molecules                 |
|---------------------------------------------------------------------------|---------------|-------|---------------|------------|-------------|-------------------------|---------------------------|
| Ingenuity Canonical Pathways                                              |               |       |               |            |             |                         |                           |
| HER-2 Signaling in Breast Cancer                                          | 0.52          | 0.02  | 0/82 (0%)     | 0/82 (0%)  | 2/82 (2%)   | 80/82 (98%)             | GRB2,HRAS                 |
| IL-12 Signaling and Production in Macrophages                             | 0.51          | 0.02  | 0/157 (0%)    | 0/157 (0%) | 3/157 (2%)  | 154/157 (98%)           | MAPK14,MAPK1,MAPK3        |
| Antiproliferative Role of TOB in T Cell Signaling                         | 0.50          | 0.04  | 0/26 (0%)     | 0/26 (0%)  | 1/26 (4%)   | 25/26 (96%)             | MAPK1                     |
| D-myo-inositol-5-phosphate Metabolism                                     | 0.49          | 0.02  | 1/159 (1%)    | 0/159 (0%) | 2/159 (1%)  | 156/159 (98%)           | NUDT3,PLCB3,RASA1         |
| D-myo-inositol (1,4,5)-Trisphosphate Biosynthesis                         | 0.49          | 0.03  | 1/38 (3%)     | 0/38 (0%)  | 0/38 (0%)   | 37/38 (97%)             | PLCB3                     |
| Cytotoxic T Lymphocyte-mediated Apoptosis of Target Cells                 | 0.48          | 0.02  | 0/88 (0%)     | 0/88 (0%)  | 2/88 (2%)   | 86/88 (98%)             | HLA-A,CYCS                |
| Intrinsic Prothrombin Activation Pathway                                  | 0.47          | 0.03  | 0/37 (0%)     | 0/37 (0%)  | 1/37 (3%)   | 36/37 (97%)             | KNG1                      |
| Glutathione-mediated Detoxification                                       | 0.47          | 0.02  | 1/44 (2%)     | 0/44 (0%)  | 0/44 (0%)   | 43/44 (98%)             | MGST1                     |
| TR/RXR Activation                                                         | 0.45          | 0.02  | 0/109 (0%)    | 0/109 (0%) | 2/109 (2%)  | 107/109 (98%)           | PFKP,ME1                  |
| Role of p14/p19ARF in Tumor Suppression                                   | 0.45          | 0.03  | 0/35 (0%)     | 0/35 (0%)  | 1/35 (3%)   | 34/35 (97%)             | SF3A1                     |
| Virus Entry via Endocytic Pathways                                        | 0.43          | 0.02  | 0/101 (0%)    | 0/101 (0%) | 2/101 (2%)  | 99/101 (98%)            | HLA-A,HRAS                |
| Thyroid Hormone Metabolism II (via Conjugation and/or Degradation)        | 0.43          | 0.02  | 0/53 (0%)     | 0/53 (0%)  | 1/53 (2%)   | 52/53 (98%)             | B3GAT3                    |
| TWEAK Signaling                                                           | 0.42          | 0.03  | 0/39 (0%)     | 0/39 (0%)  | 1/39 (3%)   | 38/39 (97%)             | CYCS                      |
| Triacylglycerol Biosynthesis                                              | 0.42          | 0.02  | 1/46 (2%)     | 0/46 (0%)  | 0/46 (0%)   | 45/46 (98%)             | LCLAT1                    |
| Serotonin Receptor Signaling                                              | 0.42          | 0.02  | 0/49 (0%)     | 0/49 (0%)  | 1/49 (2%)   | 48/49 (98%)             | QDPR                      |
| Role of Osteoblasts, Osteoclasts and Chondrocytes in Rheumatoid Arthritis | 0.40          | 0.02  | 0/249 (0%)    | 0/249 (0%) | 4/249 (2%)  | 245/249 (98%)           | MAPK14,MAPK1,MAPK3,GSN    |
| Stearate Biosynthesis I (Animals)                                         | 0.40          | 0.02  | 0/49 (0%)     | 0/49 (0%)  | 1/49 (2%)   | 48/49 (98%)             | ACSL1                     |
| LPS/IL-1 Mediated Inhibition of RXR Function                              | 0.40          | 0.02  | 2/245 (1%)    | 0/245 (0%) | 2/245 (1%)  | 241/245 (98%)           | ECSIT,MGST1,ALDH1L2,ACSL1 |
| SAPK/JNK Signaling                                                        | 0.39          | 0.02  | 0/105 (0%)    | 0/105 (0%) | 2/105 (2%)  | 103/105 (98%)           | GRB2,HRAS                 |
| Antigen Presentation Pathway                                              | 0.38          | 0.02  | 0/42 (0%)     | 0/42 (0%)  | 1/42 (2%)   | 41/42 (98%)             | HLA-A                     |
| NF-κB Signaling                                                           | 0.36          | 0.02  | 0/174 (0%)    | 0/174 (0%) | 3/174 (2%)  | 171/174 (98%)           | PRKACB,PRKACA,HRAS        |
| Production of Nitric Oxide and Reactive Oxygen Species in Macrophages     | 0.31          | 0.01  | 0/212 (0%)    | 0/212 (0%) | 3/212 (1%)  | 209/212 (99%)           | MAPK14,MAPK1,MAPK3        |
| Graft-versus-Host Disease Signaling                                       | 0.31          | 0.02  | 0/51 (0%)     | 0/51 (0%)  | 1/51 (2%)   | 50/51 (98%)             | HLA-A                     |
| Autoimmune Thyroid Disease Signaling                                      | 0.30          | 0.02  | 0/62 (0%)     | 0/62 (0%)  | 1/62 (2%)   | 61/62 (98%)             | HLA-A                     |
| TNFR1 Signaling                                                           | 0.30          | 0.02  | 0/54 (0%)     | 0/54 (0%)  | 1/54 (2%)   | 53/54 (98%)             | CYCS                      |
| nNOS Signaling in Neurons                                                 | 0.30          | 0.02  | 0/52 (0%)     | 0/52 (0%)  | 1/52 (2%)   | 51/52 (98%)             | PFKM                      |
| Agranulocyte Adhesion and Diapedesis                                      | 0.30          | 0.02  | 0/191 (0%)    | 0/191 (0%) | 3/191 (2%)  | 188/191 (98%)           | MYH10,FN1,GNAI1           |
| CD27 Signaling in Lymphocytes                                             | 0.28          | 0.02  | 0/59 (0%)     | 0/59 (0%)  | 1/59 (2%)   | 58/59 (98%)             | CYCS                      |
| D-myo-inositol (1,4,5,6)-Tetrakisphosphate Biosynthesis                   | 0.28          | 0.01  | 0/142 (0%)    | 0/142 (0%) | 2/142 (1%)  | 140/142 (99%)           | NUDT3,RASA1               |
| D-myo-inositol (3,4,5,6)-tetrakisphosphate Biosynthesis                   | 0.28          | 0.01  | 0/142 (0%)    | 0/142 (0%) | 2/142 (1%)  | 140/142 (99%)           | NUDT3,RASA1               |
| mTOR Signaling                                                            | 0.28          | 0.01  | 0/213 (0%)    | 0/213 (0%) | 3/213 (1%)  | 210/213 (99%)           | MAPK1,MAPK3,HRAS          |
| Leukocyte Extravasation Signaling                                         | 0.26          | 0.01  | 0/210 (0%)    | 0/210 (0%) | 3/210 (1%)  | 207/210 (99%)           | MAPK14,MAPK1,GNAI1        |
| Nur77 Signaling in T Lymphocytes                                          | 0.26          | 0.02  | 0/64 (0%)     | 0/64 (0%)  | 1/64 (2%)   | 63/64 (98%)             | CYCS                      |
| Melatonin Degradation I                                                   | 0.26          | 0.02  | 0/66 (0%)     | 0/66 (0%)  | 1/66 (2%)   | 65/66 (98%)             | B3GAT3                    |
| Chondroitin Sulfate Biosynthesis                                          | 0.26          | 0.01  | 0/72 (0%)     | 0/72 (0%)  | 1/72 (1%)   | 71/72 (99%)             | B3GAT3                    |
| Phospholipases                                                            | 0.25          | 0.01  | 1/67 (1%)     | 0/67 (0%)  | 0/67 (0%)   | 66/67 (99%)             | PLCB3                     |
| Dermatan Sulfate Biosynthesis                                             | 0.25          | 0.01  | 0/73 (0%)     | 0/73 (0%)  | 1/73 (1%)   | 72/73 (99%)             | B3GAT3                    |
| Heparan Sulfate Biosynthesis                                              | 0.24          | 0.01  | 0/75 (0%)     | 0/75 (0%)  | 1/75 (1%)   | 74/75 (99%)             | B3GAT3                    |
| Death Receptor Signaling                                                  | 0.24          | 0.01  | 0/68 (0%)     | 0/68 (0%)  | 1/68 (1%)   | 67/68 (99%)             | CYCS                      |
| Induction of Apoptosis by HIV1                                            | 0.24          | 0.01  | 0/67 (0%)     | 0/67 (0%)  | 1/67 (1%)   | 66/67 (99%)             | CYCS                      |
| ATM Signaling                                                             | 0.23          | 0.02  | 0/66 (0%)     | 0/66 (0%)  | 1/66 (2%)   | 65/66 (98%)             | MAPK14                    |
| Superpathway of Melatonin Degradation                                     | 0.23          | 0.01  | 0/81 (0%)     | 0/81 (0%)  | 1/81 (1%)   | 80/81 (99%)             | B3GAT3                    |
| Serotonin Degradation                                                     | 0.23          | 0.01  | 0/78 (0%)     | 0/78 (0%)  | 1/78 (1%)   | 77/78 (99%)             | B3GAT3                    |
| Macropinocytosis Signaling                                                | 0.20          | 0.01  | 0/77 (0%)     | 0/77 (0%)  | 1/77 (1%)   | 76/77 (99%)             | HRAS                      |

**Supplementary Table 4 Validation of Seven Proteins Expressed in PNETs by Immunohistochemical Staining and Western blot**

| Protein | Insulinoma      |                    | Non-insulinoma  |                    | PNET            |                    |
|---------|-----------------|--------------------|-----------------|--------------------|-----------------|--------------------|
|         | tumoral tissues | peritumoral tissue | tumoral tissues | peritumoral tissue | tumoral tissues | peritumoral tissue |
| UCH-L1  | 22/37 = 59%     | 1/23 = 4%          | 5/15 = 33%      | 0/8 = 0%           | 27/52 = 52%     | 1/32 = 3%          |
| MAP1B   | 25/33 = 76%     | 0/23 = 0%          | 7/15 = 47%      | 0/4 = 0%           | 32/48 = 67%     | 0/27 = 0%          |
| MAP2    | 17/33 = 52%     | 1/23 = 4%          | 6/15 = 40%      | 0/4 = 0%           | 23/48 = 48%     | 1/27 = 4%          |
| VCAN    | 20/25 = 80%     | 0/13 = 0           | 10/15 = 67%     | 0/6 = 0            | 30/40 = 75%     | 0/19 = 0%          |
| PDX-1   | 36/41 = 88%     | 9/35 = 26%         | 0/6 = 0         | 0/6 = 0            | 36/47 = 77%     | 9/41 = 22%         |
| CaSR    | 27/29 = 93%     | 12/25= 48%         |                 |                    |                 |                    |
| CDK4    | 36/37 = 97%     | 20/25 = 80%        | 15/15 =100%     | 5/5 = 100%         | 51/52 = 98%     | 25/30 = 83%        |

**Supplementary Table 5 Correlation of Clinicopathological Characteristics with Expression of UCH-L1**

| Clinicopathological Features |      | Expression of UCH-L1 |            | P value |
|------------------------------|------|----------------------|------------|---------|
|                              |      | Present (%)          | Absent (%) |         |
| <b>Insulinomas (n=154)</b>   |      | 83(53.9)             | 71(46.1)   |         |
| Ki-67(n=126)                 | ≅ 2% | 52(52.0)             | 48(48.0)   | 0.867   |
|                              | > 2% | 14(53.8)             | 12(46.2)   |         |
| metastasis (n=151)           | Yes  | 3 (37.5)             | 5(62.5)    | 0.327   |
|                              | No   | 79(55.2)             | 64(44.8)   |         |
| stage (n=150)                | I    | 47(56.0)             | 37(44.0)   | 0.926   |
|                              | II   | 31(54.4)             | 26(45.6)   |         |
|                              | III  | 1(50)                | 1(50)      |         |
|                              | IV   | 3 (42.9)             | 4(57.1)    |         |
| overall survival (n=101)     |      | 56(55.4)             | 45(44.6)   | 0.179   |
| death (n=5)                  |      | 1 (20.0)             | 4(80.0)    |         |
| disease free survival (n=97) |      | 55(56.7)             | 42(43.3)   | 0.047   |

|                                      |                 |           |             |       |
|--------------------------------------|-----------------|-----------|-------------|-------|
| survival with disease or death (n=7) |                 | 1(14.3)   | 6(85.7)     |       |
| <b>All PNETs (n=314)</b>             |                 | 137(43.6) | 177(56.4)   |       |
| location(n=292)                      | pancreatic head | 60(47.2)  | 67(52.8)    | 0.473 |
|                                      | body/tail       | 71(43.0)  | 94(57.0)    |       |
| Ki-67 (n=234)                        | ≅ 2%            | 75(43.6)  | 97(56.4)    | 0.654 |
|                                      | > 2%            | 25(40.3)  | 37(59.7)    |       |
| metastasis(n=314)                    | Yes             | 31(37.8)  | 51(62.2)    | 0.216 |
|                                      | No              | 106(45.7) | 126(54.3)   |       |
| size [range](cm) (n=302)             |                 | 2[0.7-15] | 3 [0.8-17]  | 0.024 |
| <b>Patients with PNETs(n=306)</b>    |                 | 135(44.1) | 171(55.9)   |       |
| age at diagnosis (year)(n=305)       |                 | 47(18-85) | 49.5(15-84) | 0.078 |
| gender (n=305)                       | male            | 47(36.4)  | 82(63.6)    | 0.024 |
|                                      | female          | 87(49.4)  | 89(50.6)    |       |
| grade (n=250)                        | G1              | 57(40.7)  | 83(59.3)    | 0.303 |
|                                      | G2              | 48(46.2)  | 56(53.8)    |       |



|                                       |      |          |           |       |
|---------------------------------------|------|----------|-----------|-------|
|                                       | G3   | 1(16.7)  | 5(83.3)   |       |
| stage (n=305)                         | I    | 50(52.6) | 45(47.4)  | 0.093 |
|                                       | II a | 45(45.9) | 53(54.1)  |       |
|                                       | II b | 11(31.4) | 24(68.6)  |       |
|                                       | III  | 14(46.7) | 16(53.3)  |       |
|                                       | IV   | 14(29.8) | 33(70.2)  |       |
| recurrence (n=235)                    | No   | 80(47.7) | 92(52.3)  | 0.071 |
|                                       | Yes  | 21(30.5) | 42(69.5)  |       |
| overall survival (n=199)              |      | 86(43.2) | 113(56.8) | 0.466 |
| death (n=38)                          |      | 14(36.8) | 24(63.2)  |       |
| disease free survival (n=170)         |      | 80(47.1) | 90(52.9)  | 0.013 |
| survival with disease or death (n=65) |      | 19(29.2) | 46(70.8)  |       |

**Supplementary Table 6-a Cox Models of Overall Survival**

| Variable<br>N=214   | Model A             |                | Variable<br>N=209                            | Model B             |                |
|---------------------|---------------------|----------------|----------------------------------------------|---------------------|----------------|
|                     | HR (95% CI)         | <i>P</i> value |                                              | HR (95% CI)         | <i>P</i> value |
| Age (year)          | 0.991 (0.961-1.022) | 0.567          | Age (year)                                   | 0.983 (0.952-1.014) | 0.281          |
| Gender              | 0.952 (0.465-1.952) | 0.894          | Gender                                       | 1.091 (0.551-2.161) | 0.802          |
| Grade               | 2.685 (1.250-5.768) | 0.011          | Grade                                        | 2.696 (1.291-5.629) | 0.008          |
| Stage               | 3.118 (2.086-4.662) | 2.99E-8        | Stage                                        | 2.652 (1.766-3.982) | 2.55E-6        |
| UCH-L1 <sup>a</sup> | 0.757 (0.361-1.591) | 0.463          | UCH-L1 and $\alpha$ -internexin <sup>b</sup> | 0.141 (0.018-1.088) | 0.060          |

**Supplementary Table 6-b Cox Models of Disease-free Survival**

| Variable<br>N=200   | Model A             |                | Variable<br>N=194                            | Model B             |                |
|---------------------|---------------------|----------------|----------------------------------------------|---------------------|----------------|
|                     | HR (95% CI)         | <i>P</i> value |                                              | HR (95% CI)         | <i>P</i> value |
| Age (year)          | 0.982 (0.960-1.004) | 0.102          | Age (year)                                   | 0.975 (0.954-0.997) | 0.027          |
| Gender              | 0.895 (0.488-1.642) | 0.720          | Gender                                       | 1.135 (0.624-2.065) | 0.678          |
| Grade               | 3.978 (2.114-7.484) | 1.86E-5        | Grade                                        | 3.323 (1.836-6.016) | 7.33E-5        |
| Stage               | 3.791 (2.721-5.283) | 1.04E-13       | Stage                                        | 3.327 (2.383-4.644) | 1.71E-12       |
| UCH-L1 <sup>a</sup> | 0.460 (0.243-0.873) | 0.018          | UCH-L1 and $\alpha$ -internexin <sup>b</sup> | 0.215 (0.064-0.716) | 0.012          |

<sup>a</sup> UCH-L1 means positive expression of Ubiquitin C-terminal Hydrolase-L1

<sup>b</sup> UCH-L1 and  $\alpha$ -internexin means positive expression of both Ubiquitin C-terminal Hydrolase-L1 and  $\alpha$ -internexin

**Supplementary Table 7 Cox Models of Disease Free Survival in Patients with Stage II and III**

| Variable n=116                               | HR (95% CI)          | <i>P</i> value |
|----------------------------------------------|----------------------|----------------|
| Age(year)                                    | 0.987 (0.961-1.013)  | 0.319          |
| Gender                                       | 0.797 (0.356-1.785)  | 0.582          |
| Grade                                        | 7.371 (2.740-19.831) | 7.61E-5        |
| Size                                         | 1.109 (0.999-1.231)  | 0.053          |
| Metastasis                                   | 0.280 (0.128-0.612)  | 0.001          |
| UCH-L1 and $\alpha$ -internexin <sup>a</sup> | 0.167 (0.038-0.731)  | 0.017          |

<sup>a</sup> UCH-L1 and  $\alpha$ -internexin means positive expression of both Ubiquitin C-terminal Hydrolase-L1 and  $\alpha$ -internexin protein

**Supplementary Table 8-a Cox Models in Non-Insulinoma**

| Variable<br>N=114                            | OS                  |                | Variable<br>N=104                            | DFS                 |                |
|----------------------------------------------|---------------------|----------------|----------------------------------------------|---------------------|----------------|
|                                              | HR (95% CI)         | <i>P</i> value |                                              | HR (95% CI)         | <i>P</i> value |
| Age (year)                                   | 0.975 (0.939-1.011) | 0.169          | Age (year)                                   | 0.973 (0.948-0.997) | 0.031          |
| Gender                                       | 0.977 (0.459-2.080) | 0.953          | Gender                                       | 1.071 (0.572-2.004) | 0.831          |
| Grade                                        | 2.939 (1.303-6.630) | 0.009          | Grade                                        | 3.100 (1.676-5.732) | 3.10E-4        |
| Stage                                        | 1.890 (1.209-2.955) | 0.005          | Stage                                        | 2.601 (1.798-3.762) | 3.86E-7        |
| UCH-L1 and $\alpha$ -internexin <sup>b</sup> | 0.214 (0.028-1.617) | 0.135          | UCH-L1 and $\alpha$ -internexin <sup>b</sup> | 0.419 (0.128-1.369) | 0.150          |

**Supplementary Table 8-b Cox Models in Functional PNETs**

| Variable<br>N=106                            | DFS                  |                |
|----------------------------------------------|----------------------|----------------|
|                                              | HR (95% CI)          | <i>P</i> value |
| Age (year)                                   | 0.957 (0.919-0.996)  | 0.033          |
| Gender                                       | 1.171 (0.410-3.349)  | 0.768          |
| Grade                                        | 3.847 (0.803-18.431) | 0.092          |
| Stage                                        | 4.152 (2.252-7.657)  | 5.14E-6        |
| UCH-L1 and $\alpha$ -internexin <sup>b</sup> | 0.180 (0.019-1.662)  | 0.130          |

**Supplementary Table 8-c Cox Models in Non-functional PNETs**

| Variable<br>N=93                             | OS                  |                | Variable<br>N=87                             | DFS                 |                |
|----------------------------------------------|---------------------|----------------|----------------------------------------------|---------------------|----------------|
|                                              | HR (95% CI)         | <i>P</i> value |                                              | HR (95% CI)         | <i>P</i> value |
| Age (year)                                   | 0.969 (0.933-1.006) | 0.101          | Age (year)                                   | 0.984 (0.957-1.012) | 0.258          |
| Gender                                       | 2.141 (0.877-5.225) | 0.094          | Gender                                       | 1.031 (0.489-2.175) | 0.935          |
| Grade                                        | 3.346 (1.551-7.219) | 0.002          | Grade                                        | 3.070 (1.600-5.891) | 0.001          |
| Stage                                        | 2.577 (1.556-4.269) | 2.37E-4        | Stage                                        | 2.982 (1.897-4.686) | 2.18E-6        |
| UCH-L1 and $\alpha$ -internexin <sup>b</sup> | 0.194 (0.025-1.499) | 0.116          | UCH-L1 and $\alpha$ -internexin <sup>b</sup> | 0.283 (0.067-1.202) | 0.087          |

<sup>b</sup>UCH-L1 and  $\alpha$ -internexin means positive expression of both Ubiquitin C-terminal Hydrolase-L1 and  $\alpha$ -internexin

**Supplementary Table S9 Diagram of Sample Numbers**

**1. Proteomic Analysis** (4 insulinoma tissues and 4 paired peri-tumoral tissues)

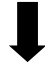

**2. Validating the expression of 7 proteins by IHC and Western blot**

| Protein | IHC, n          |                    | Western blot, n |                              |
|---------|-----------------|--------------------|-----------------|------------------------------|
|         | tumoral tissues | peritumoral tissue | tumoral tissues | Peritumoral or normal tissue |
| UCH-L1  | 52              | 32                 | 10              | 4                            |
| MAP1B   | 48              | 27                 |                 |                              |
| MAP2    | 48              | 27                 |                 |                              |
| VCAN    | 40              | 19                 |                 |                              |
| PDX-1   | 47              | 41                 |                 |                              |
| CaSR    | 29              | 25                 | 10              | 4                            |
| CDK4    | 52              | 30                 | 10              | 4                            |

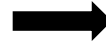

**3. Methylation-specific PCR (MSP) and Bisulfate Sequencing** (21 fresh frozen tumoral tissues, 9 paired peritumoral tissues and 3 normal pancreatic tissues )

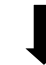

**4. UCH-L1 expression**

|              | PNETs | Patients with PNETs | Followed-up patients |
|--------------|-------|---------------------|----------------------|
| All          | 314   | 306 <sup>a</sup>    | 247                  |
| Collective I | 170   | 164 <sup>b</sup>    | 117                  |

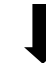

**5. Both UCH-L1 and INX Expression**

|               | PNETs | Patients with PNETs | Followed-up patients |
|---------------|-------|---------------------|----------------------|
| Two cohorts   | 290   | 283 <sup>c</sup>    | 239                  |
| Collective I  | 155   | 150 <sup>d</sup>    | 117                  |
| Collective II | 135   | 133 <sup>e</sup>    | 122                  |

<sup>a</sup> 1 patient has 1 primary tumor and 2 metastatic tumors, 6 patients have 1 primary tumor and 1 metastatic tumor;

<sup>b</sup> 1 patient has 1 primary tumor and 2 metastatic tumors, 4 patients have 1 primary tumor and 1 metastatic tumor;

<sup>c</sup> 1 patient has 1 primary tumor and 2 metastatic tumors, 5 patients have 1 primary tumor and 1 metastatic tumor;

<sup>d</sup> 1 patient has 1 primary tumor and 2 metastatic tumors, 3 patients have 1 primary tumor and 1 metastatic tumor;

<sup>e</sup> 2 patients have 1 primary tumor and 1 metastatic tumor.
